# 1 **Astrocytes encode complex behaviorally relevant information**

2  
3

4 **Katharina Merten<sup>1,\*</sup>, Robert W. Folk<sup>1</sup>, Daniela Duarte<sup>1</sup> and Axel Nimmerjahn<sup>1,\*</sup>**

5 <sup>1</sup>Waitt Advanced Biophotonics Center, The Salk Institute for Biological Studies, La Jolla, CA  
6 92037, USA

7 \*Correspondence: [kmerten@salk.edu](mailto:kmerten@salk.edu) (K.M.), [animmerj@salk.edu](mailto:animmerj@salk.edu) (A.N.)

8

## 9 **Abstract**

10 Astrocytes, glial cells of the central nervous system, help to regulate neural circuit operation and  
11 adaptation. They exhibit complex forms of chemical excitation, most prominently calcium  
12 transients, evoked by neuromodulator and -transmitter receptor activation<sup>1-4</sup>. However, whether  
13 and how astrocytes contribute to cortical processing of complex behavior remains unknown<sup>1</sup>.  
14 One of the puzzling features of astrocyte calcium transients is the high degree of variability in  
15 their spatial and temporal patterns under behaving conditions. Here, we provide mechanistic  
16 links between astrocytes' activity patterns, molecular signaling, and behavioral cognitive and  
17 motor activity variables by employing a visual detection task that allows for in vivo calcium  
18 imaging, robust statistical analyses, and machine learning approaches. We show that trial type  
19 and performance levels deterministically shape astrocytes' spatial and temporal response  
20 properties. Astrocytes encode the animals' decision, reward, and sensory properties. Our error  
21 analysis confirms that astrocytes carry behaviorally relevant information depending on and  
22 complementing neuronal coding. We also report that cell-intrinsic mechanisms curb astrocyte  
23 calcium activity. Additionally, we show that motor activity-related parameters strongly impact  
24 astrocyte responses and must be considered in sensorimotor study designs. Our data inform  
25 and constrain current models of astrocytes' contribution to complex behavior and brain  
26 computation beyond their established homeostatic and metabolic roles.

27

## 28 **Introduction**

29 Mounting evidence from multiple species and central nervous system regions suggests that  
30 astrocytes play pivotal roles in neural circuit function and behavior<sup>2,3,5</sup>. Although not electrically  
31 excitable, astrocytes display a complex repertoire of intracellular signaling, most prominently  
32 calcium transients, triggered by neurotransmitter and neuromodulator receptor activation on  
33 their surface. This signaling spans multiple spatial and temporal scales, from sub-second  
34 transients in single astrocytes to seconds- or even minutes-long transients in astrocytic  
35 networks, suggesting that astrocytes may carry out computations on various timescales related  
36 to sensory processing, brain state modulation, and memory formation<sup>1,2,4</sup>.

37

38 Despite the recent technical progress in measuring neuronal, astrocyte, and transmitter  
39 dynamics in behaving animals, a key unresolved question is precisely how astrocyte excitation  
40 relates to animal behavior and how it may contribute to brain computation of cognitive functions.  
41 This knowledge gap is partly due to the lack of standardized quantitative behavioral assays that  
42 allow tight control over the animal's behavior and associated cellular and molecular signaling.  
43 Additionally, data analysis approaches are often based on manually drawn regions of interest,  
44 which are poorly suited to capture the complexity of astrocyte excitation or its relationship to  
45 circuit dynamics and behavior<sup>6,7</sup>. Moreover, recent studies reporting astrocytic encoding of  
46 spatial information<sup>8</sup> or reward location<sup>9</sup> in the hippocampus have neglected the impact of mouse  
47 motor behavior on astrocyte responses. Astrocytes are known to exhibit widespread calcium  
48 excitation during locomotion mediated by local neurotransmitter and volumetric neuromodulator  
49 release<sup>10-12</sup>. Therefore, run parameters, particularly the timing of astrocyte response onset  
50 relative to run onset and the period between runs, might strongly influence experimental results  
51 and interpretation.

52

53 Using a quantitative visual detection task, in vivo calcium imaging, robust statistical analyses  
54 that account for the joint influence of run and cognitive parameters, and machine learning  
55 approaches, we show that astrocyte population transients ("syncytium responses") in the mouse  
56 motor cortex are deterministic and encode information about the stimulus, trial type, reward,  
57 decision, and the animal's performance level. Astrocyte responses were also significantly linked  
58 to run onset, run duration, and inter-run interval. Additionally, we show that astrocyte population  
59 responses underlie intrinsic constraints. Our data provide insight into fundamental computations  
60 within astrocyte networks and the integration and transformation of molecular signals within their  
61 environment, suggesting that these cells contribute to complex behavior and brain computation  
62 beyond their established homeostatic and metabolic roles.

63

## 64 **Results**

65 To investigate whether astrocytes contribute to cortical information processing and the encoding  
66 of complex behavior, we recorded their activity in a visual detection task. This behavioral assay  
67 involved numerous trial repetitions across multiple sessions and allowed robust regression and  
68 decoding analysis. In total, we recorded 4,837 trials across 21 behavioral sessions (see  
69 **Methods**). Mice were trained to report the presence or absence of a visual stimulus by running  
70 on a spherical treadmill for a fluid reward (**Fig. 1a,b**). Stimuli were presented at two intensity  
71 levels: i) salient and ii) close to the animal's perceptual level. The internal state of the mouse  
72 determined whether it had seen the stimulus ('yes' decision if the animal initiated a run during  
73 stimulus presentation; 'no' decision if it stood still for >3 s). Decision outcomes were classified  
74 according to signal detection theory (**Fig. 1c**). Before stimulus presentation, the mice were  
75 required to stand still for 20 s. If mice interrupted the stand-still phase, the trial was aborted and  
76 counted as a spontaneous run. **Fig. 1d** shows trial outcome proportions for an example session.  
77 To create psychometric detection curves for each animal, we used the proportion of 'yes'

78 decisions for the two stimulus intensities (**Fig. 1e**). The mice were rewarded on correct trials  
79 only (hits and correct rejections). Trials with stimuli close to the perceptual threshold, in which  
80 the animals did not detect the stimulus, were not reinforced. This reward contingency led to a  
81 slight bias of the mice to erroneously report the presence of a stimulus in some of the stimulus  
82 absent trials (**Fig. 1e**). The animals' performance levels varied within and across sessions. We  
83 computed a measure of discriminability ( $d'$ ) derived from signal detection theory<sup>13</sup> by subtracting  
84 z-scores (normal deviates) of median 'hit' rates from z-scores of median 'false alarm' rates  
85 (**Fig. 1f**). Performance intervals exceeding the detection threshold were considered high-  
86 performance states, whereas periods with  $d' < 2$  were classified as low-performance states.

87

88 Astrocyte calcium activity in fully trained GFAP-GCaMP6f mice was recorded using two-photon  
89 imaging (**Fig. 1g**). All recordings were performed in cortical layer 2/3 of the primary and  
90 secondary motor areas (M1/M2) and had a  $\sim 510 \times 640 \mu\text{m}$  field-of-view recorded at  $\sim 30.9 \text{ Hz}$   
91 (**Fig. 1g,h**). While the GFAP promoter drives expression in most and predominantly astrocytes,  
92 a limited region-dependent neuronal expression has been reported<sup>14,15</sup>. We, therefore,  
93 computationally identified and excluded any areas showing features of neuronal activity<sup>16</sup> (see  
94 **Methods**).

95

96 Next, we analyzed the animals' task-related running responses. During hit trials and false  
97 alarms (FA), the runs started shortly after stimulus presentation (mean reaction time of two  
98 representative mice: 0.7 s and 1.2 s) (**Fig. 2a**, top panel). During correct rejections (CR) and  
99 miss trials, mice remained still on the treadmill during the stimulus phase. However, during  
100 reward consumption, 97.6% of CR trials were followed by a run. Similarly, stimulus offset  
101 triggered runs in 7.2% of the miss trials.

102

103 To study astrocytes' encoding of complex cognitive functions in the context of running, we only  
104 analyzed trials that included runs with comparable characteristics (for trial selection criteria and  
105 numbers, see **Methods** and **Table 1**). Moreover, we applied multivariate analysis to explore the  
106 joint influence of cognitive and run-related variables and determine the effect of each variable in  
107 the presence of the others. To analyze astrocytes' response properties, we implemented a  
108 Region of Activity (ROA) analysis algorithm that uses three-dimensional filtering and noise-  
109 based thresholding on individual pixels over time to detect significant fluorescence transients<sup>7</sup>  
110 (see **Methods**). Astrocytic syncytium responses were plotted as the percentage of active pixels  
111 within the labeled area over time (**Extended Data Fig. 1a**). We characterized the syncytium  
112 responses by calculating their onset (relative to run onset), duration, peak value and time, and  
113 offset (**Extended Data Fig. 1b**). We also calculated the total extent of activation (i.e., projection  
114 of active pixels throughout the response interval normalized to the total labeled area) and mean  
115 duration of pixels activated during the response interval. To identify the contribution of  
116 behavioral variables (trial type, performance level, recording area, mouse identity, current and  
117 previous run parameters) to astrocyte syncytium response characteristics, we used multivariate  
118 linear mixed-effects (LME) models with recording sessions as a random effect (see **Methods**).  
119  
120 We found that behavioral context significantly influenced the astrocyte syncytium response to  
121 running. Not every run was capable of triggering an astrocyte response. In areas M1/M2, we  
122 found a significant effect of inter-run interval period on the probability of eliciting an astrocyte  
123 response (**Extended Data Fig. 2a**), a cell-intrinsic mechanism previously reported for cerebellar  
124 Bergmann glia<sup>10</sup>. The shorter the rest period, the less probable (**Extended Data Fig. 2b**),  
125 weaker (**Extended Data Fig. 2d**), and more delayed astrocyte responses were (**Extended Data**  
126 **Fig. 2c**). Nevertheless, the trial type had a significant effect on the probability of astrocyte  
127 syncytium responses. To further investigate this trial type effect, we focused on task-related

128 runs with  $\geq 20$  s stand-still phase (by task design) and spontaneous runs with  $\geq 15$  s inter-run  
129 distance. Notably, astrocyte syncytium response probability was significantly higher for  
130 rewarded runs than spontaneously initiated runs (**Fig. 2b**).

131  
132 Next, we aligned all run trial transients at the run onset to examine how syncytium responses  
133 depended on behavioral context parameters. This representation also allowed us to compare  
134 task-related trials to spontaneous runs (**Fig. 2c**). Averaged syncytium transients lasted  $\sim 10$  s,  
135 and their onset latency (3 s) was strongly correlated to run onset (**Fig. 2d**). We found  
136 significantly shorter onset latencies (2.7 s) for hit compared to CR trials (3.2 s) and spontaneous  
137 runs (3.2 s) (**Table 3**). Additionally, our LME analysis revealed that astrocyte syncytium signals  
138 significantly encoded the detection decision, with earlier onsets for hit and FA trials ('yes'  
139 decision) (**Fig. 2e, Table 9**). Applying the LME model on hit trials only, we found that syncytium  
140 responses to salient stimuli were shorter (2.6 s) than to threshold stimuli (3 s) (**Fig. 2f,**  
141 **Table 10**). The strength of astrocyte syncytium responses (i.e., its response duration, peak, total  
142 extent of activation, and mean pixel activation duration) was similar for rewarded trials (hits and  
143 CRs) (**Fig. 2g**) but stronger compared to spontaneous runs. Astrocyte syncytium responses  
144 also significantly differed between rewarded and error trials, with correct trials showing longer  
145 response durations, larger total extent, and longer mean pixel activation duration (**Fig. 2h**).  
146 Astrocyte calcium activity also significantly encoded the animals' performance levels throughout  
147 the session. The response peaks, total extent, and the mean pixel activation duration were  
148 significantly larger/longer during low-performance periods than high-performance phases  
149 (**Fig. 2i**). Finally, responses in area M1 showed more prominent peaks, total extent, and mean  
150 pixel activation duration than in area M2 (**Extended Data Fig. 3**). In summary, astrocyte  
151 syncytium responses are extraordinarily versatile, with different response characteristics  
152 encoding various behavioral features.

153

154 Notably, our LME model also revealed a significant dependence of the astrocyte syncytium  
155 response duration on the current run duration with longer runs resulting in slightly longer  
156 response durations (19%, 12%, and 35% slope for hits, CRs, and spontaneous runs,  
157 respectively; **Extended Data Fig. 4a, Table 12**). To examine this dependency more closely, we  
158 plotted astrocyte syncytium responses for different run durations (1-10 s, 10-15 s, 15-20 s, 20-  
159 30 s) for the hit and CR trials and spontaneous runs (**Fig. 3a-c**). For rewarded trials, run  
160 duration did not affect response onset. In contrast, longer run durations for spontaneous runs  
161 resulted in longer response latencies (42% slope, **Fig. 3d, Table 13**). Likewise, while the  
162 response peak location shifted only slightly toward later time points for longer runs in hit (4%  
163 slope) and CR trials (11% slope), we found a considerable peak location shift (66% slope) for  
164 spontaneous runs (**Fig. 3e, Table 14**). Additionally, when we calculated response offsets  
165 relative to the run onset, this duration increased only slightly with run duration for rewarded trials  
166 (18% increase for hit trials and 16% for CR trials). In comparison, it changed drastically for  
167 spontaneous runs (75% slope) (**Fig. 3f, Table 15**). These findings imply that different  
168 mechanisms control the on- and offset of astrocyte syncytium responses in different behavioral  
169 contexts.

170

171 Rewarded runs appeared to have a defined onset and offset period of ~15 s, within which the  
172 response peak and duration varied slightly. We calculated the difference between the response  
173 offset and run offset to investigate whether a behavioral event might trigger the astrocytic  
174 syncytium response offset. For rewarded trials, the response offset coincided with run offset for  
175 13-15 s-long runs (**Extended Data Fig. 4b**, top and center panels). For shorter runs (<13 s), the  
176 response duration outlasted the run, and for longer runs (>15 s), it was shorter (**Table 16**).  
177 Intriguingly, this 13-15 s response interval corresponds well with the duration that dopamine is  
178 detectable in the extracellular space during rewarded trials<sup>17</sup> (**Extended Data Fig. 4d**). Both

179 rewarded trial types showed higher response peaks at this 'preferred' run duration (**Fig. 3a,b**  
180 and **Extended Data Fig. 4c**, top, center panels, **Table 17**). Calculating the response offset  
181 relative to the reward onset in correct trials showed that most responses ended ~10 s after  
182 reward onset, with only a few lasting longer than 15 s (**Fig. 3g**). Similarly, aligning the  
183 responses to the longest runs (25-40 s) at reward onset showed that their offsets are similar  
184 (**Fig. 3h**). In contrast, for spontaneous runs, the astrocyte response co-varied with run duration  
185 (**Fig. 3c**), with the difference between syncytium response offset and run offset clustering  
186 around 0 s, irrespective of run duration (**Extended Data Fig. 4b**, bottom panel, **Table 16**). As  
187 expected, a histogram of response offsets relative to run offset reflects this high degree of  
188 correlation (**Fig. 3i**). Together, this data suggests that different encoding profiles underlie  
189 rewarded and spontaneous runs and that reward-related molecular signals, such as dopamine,  
190 modulate astrocytes' run-evoked syncytium responses.

191  
192 While linear regression analysis is restricted to predefined signal characteristics (e.g., onset,  
193 offset, peak, or duration), decoding models can access all information contained within the  
194 signals' time course. To infer relevant parameters from the signals' temporal dynamics, we used  
195 the k-nearest neighbor (kNN) classifier<sup>18</sup>, one of the most popular supervised machine learning  
196 algorithms for time series classification. We trained the classifier on example syncytium traces,  
197 represented as vectors in multidimensional feature space with corresponding class labels. In the  
198 subsequent test phase, the classifier was tasked with predicting the classes of syncytium  
199 transients that the classifier had not used for learning, based on the most frequent class among  
200 the *k* training samples nearest to the query vector. Bayesian optimization was used to select the  
201 distance calculation method and *k*, the number of neighbors (**Table 18**). We visualized classifier  
202 predictions using confusion matrices<sup>19</sup>. To evaluate the classifier's performance, we calculated  
203 the area under the receiver operating characteristic curve (AUC). This curve captures the true  
204 positive versus the false positive rate of the classifier at different classification thresholds,



205 thereby representing the prediction performance quality irrespective of the chosen threshold.

206 Statistical significance was derived from random permutation testing, shuffling the training data  
207 class labels, and calculating the probability that the prediction performance could be explained  
208 by chance (**Table 19**).

209

210 When we used syncytium responses for rewarded and spontaneous trials only, the kNN  
211 classifier was able to identify these two classes with high accuracy (85% correct class  
212 assignments; chance level at 50%) and AUC=0.87, significantly different from the mean  
213 calculated in the permutation test (AUC=0.5, **Fig. 4a**). The classifier also confirmed the high  
214 predictability of correct and error trials from syncytium responses (86% accuracy; chance level  
215 at 50%; AUC=0.83, **Fig. 4b**). Remarkably, the syncytium response carried information about  
216 every trial type, which the classifier could predict from the recorded trials (38% accuracy;  
217 chance level at 20%) (**Extended Data Fig. 5a**). Moreover, the classifier predicted the animals'  
218 performance level using all traces from all recorded trial types (62% accuracy; chance level at  
219 50%; AUC=0.64, **Extended Data Fig. 5b**).

220

221 Next, motivated by our LME model results showing that astrocyte syncytium responses varied  
222 substantially with run duration for spontaneous but not as much for task-related runs, we asked  
223 whether the kNN classifier could predict run duration from spontaneous runs (**Extended Data**  
224 **Fig. 5c**) and task trials (**Extended Data Fig. 5d**). We found that decoding of run duration was  
225 possible from both spontaneous (90% accuracy; chance level at 33%) and task trials (46%  
226 accuracy; chance level at 25%), with significantly higher accuracy and AUC values when  
227 spontaneous trials were used for classification ( $p < 0.05$ , Kolmogorov-Smirnov test). We  
228 reasoned that if the gradual increase of run duration in the defined run duration classes is  
229 accompanied by a gradual change in the encoding signal, the classifier decoding performance  
230 should be most robust along the main diagonal of the confusion matrix, and confusions between

231 adjacent classes should be more frequent. To test this idea, we averaged the classification  
232 probability along the main diagonal and the parallel diagonals, resulting in the average  
233 performance of the classifier as a function of distance from the actual run duration (**Extended**  
234 **Data Fig. 5c-d**, last panel). The function peaked at the probability for correctly assigning the  
235 query traces to their real run duration class, while more erroneous classifications occurred for  
236 adjacent run durations. This finding confirms the gradually changing nature of the signal  
237 underlying the decoding of spontaneous and task trials and the proper operation of the  
238 classifier.

239

240 While the previous analyses demonstrated that we could decode animal behavior (run context,  
241 reward delivery, performance level, run duration) from astrocyte syncytium responses, we also  
242 wanted to know whether the responses were relevant for the animals' behavior. If the astrocytic  
243 signal is relevant for mouse behavior, the decision should be decodable from correct and error  
244 trials. Indeed, we found that the perceptual decision of the animal could be decoded from  
245 correct (hit and CR) trials (62% accuracy; chance level at 50%; **Extended Data Fig. 6a**). Next,  
246 we trained the kNN classifier on correct decision trials (hit trial: 'yes' decision; CR trial: 'no'  
247 decision) and used the signals for erroneous decisions (miss trial: 'no' decision, FA trial: 'yes'  
248 decision) as a test dataset. We found that error trials also carried significant information about  
249 the decision (**Extended Data Fig. 6b**). Finally, we examined whether areas M1/M2 encoded  
250 information about the nature of the sensory information that was essential for the animals'  
251 decision. In accordance with our LME model results (**Fig. 2f**), the classifier was able to decode  
252 information about the presented stimulus intensity from the astrocyte syncytium responses to hit  
253 trials (65% accuracy; chance level at 50%; **Extended Data Fig. 6c**). Importantly, decoding of  
254 stimulus type information was not possible from astrocyte syncytium responses to miss trials  
255 (53% accuracy; **Extended Data Fig. 6d**), implying that sensory information important for

256 decision-making was absent in error trials. Together, these findings suggest that the information  
257 encoded by astrocyte syncytium responses is relevant for animal behavior.

258

## 259 **Discussion**

260 In summary, the astrocyte syncytium calcium response is a complex yet deterministic signal  
261 encoding several aspects of behavioral context. Signal onset was tightly linked to run onset in  
262 rewarded trials, with an earlier calcium response encoding the animal's decision (**Fig. 2e**) and  
263 stimulus intensity (**Fig. 2f**). Interestingly, in spontaneous runs, the response onset had a  
264 significant delay for longer run durations. Response duration was influenced by both decision  
265 correctness in task trials and run duration (**Fig. 2g**). Response offset correlated with dopamine  
266 levels in rewarded trials and run offset in spontaneous runs (**Extended Data Fig. 4d, Fig. 3i**).

267 The overall strength of the calcium response was impacted by trial type, with rewarded trials  
268 showing the most notable increase (**Fig. 2g**). The amplitude was also significantly modulated by  
269 the animal's performance level (**Fig. 2i**) and potentially by run parameters linked to reward  
270 expectation (**Fig. 3a-b**). The inter-run interval had a significant impact on the probability and  
271 strength of the astrocytic response in task trials and spontaneously initiated runs. Notably, the  
272 information encoded in the astrocyte syncytium calcium responses was behaviorally relevant  
273 (**Extended Data Fig. 6**).

274

275 What mechanisms might control astrocyte syncytium responses? Because astrocytes do not  
276 exhibit stereotyped calcium waveforms like those evoked by neuronal action potentials, previous  
277 work suggested that their transients result from spatial and temporal integration of behavior-  
278 related extracellular molecular signals released, for example, by local and projection neurons<sup>1</sup>.

279 The complex yet deterministic nature of astrocyte syncytium responses revealed by our study  
280 supports this notion. Response duration and amplitude depended, amongst others, on run  
281 duration, suggesting integration of ongoing synaptic activity by astrocytes (**Fig. 3**). Rewarded hit

282 and CR trials showed larger syncytium responses than unrewarded trials with a 'preferred' run  
283 duration. One possible explanation for this 'preferred' run duration is that 13 s-long runs offer  
284 the highest reward probability to the animal, with astrocytes reflecting the corresponding local  
285 activity of M1/M2 neurons. Another possibility is that dopamine's time course determines the  
286 peak of the astrocyte syncytium response in rewarded runs. The time course of previously  
287 measured dopamine signals in the same region and task are consistent with this hypothesis<sup>17,20</sup>  
288 (**Fig. 2; Extended Data Fig. 4**). We also found that astrocyte syncytium responses in run trials  
289 are significantly different from no-run trials. Specifically, the probability of miss and CR trials  
290 without a run was significantly lower than those with a run (**Extended Data Fig. 7a,b**).  
291 Moreover, the syncytium responses to no-run trials had significantly longer response latencies  
292 (**Extended Data Fig. 7c**), were shorter, reached lower peak values, and showed lower total  
293 activation extent (**Extended Data Fig. 7d**). This observation seems consistent with previous  
294 work showing that locomotion mediates noradrenaline release and widespread astrocyte  
295 calcium excitation and that the astrocyte response is boosted in the presence of sensorimotor-  
296 evoked local neural activity<sup>11,12</sup>. How astrocyte syncytium responses may differ in behavioral  
297 tasks that do not involve a running response (e.g., lever press/release task) remains to be  
298 determined. Apart from dopamine and noradrenaline, additional neuromodulator signals, such  
299 as acetylcholine, may also modulate astrocytes' phasic syncytium responses<sup>21,22</sup>. Our finding  
300 that astrocyte responses were larger during low-performance states may, at least in part, be  
301 explained by higher tonic neuromodulator levels (e.g., noradrenaline) associated with this  
302 cortical state<sup>23,24</sup> (**Fig. 2**). Together, our data seem consistent with the concept of spatial and  
303 temporal integration of neurotransmitter and neuromodulator signals in shaping astrocyte  
304 syncytium responses in the M1/M2 cortex. Nevertheless, to better understand the syncytium  
305 signal's building blocks and regional differences, an analysis of individual regions of interest or  
306 astrocyte compartments may be informative.

307  
308 How might astrocyte syncytium responses affect local neural circuits? Our findings suggest that  
309 astrocytes' signaling is encoding relevant behavioral information (**Extended Data Fig. 6**).  
310 However, one of the striking features of astrocyte syncytium responses is their seconds-long  
311 delay relative to run onset (**Fig. 2; Extended Data Fig. 1**), likely due to signal integration within  
312 astrocytes (e.g., IP<sub>3</sub>, which mediates endoplasmic reticulum (ER) calcium release)<sup>3,25</sup>. This  
313 delay, together with the syncytium responses' slow time course, indicates that astrocyte  
314 excitation likely serves complementary roles to neuronal activity, particularly those preceding or  
315 initiating the behavioral response (e.g., decision making or motor planning). One potential role  
316 of astrocyte syncytium responses may be circuit regulation. Following task execution, astrocytes  
317 may restore the neural circuit's ionic and transmitter homeostasis, thus ensuring the circuit's  
318 continued operation with optimal signal-to-noise ratio and gain. Additionally, they may actively  
319 tune the system when the executed behavior does not reliably achieve the desired outcome  
320 (e.g., reward)<sup>26,27</sup>. By establishing a computational "review period" of past events, astrocytes  
321 could potentially inform future behavior, enabling trial-to-trial behavioral adjustments or learning.  
322 If these considerations are correct, they might explain why astrocyte syncytium responses  
323 depended on behavioral performance and perceptual level (**Figs. 1-2**). These hypotheses might  
324 be tested by an in-depth analysis of trial history and performance as a function of the inter-run  
325 interval, which strongly affects astrocytes' response probability and strength (**Extended Data**  
326 **Fig. 2**).

327  
328 Given the complex yet predictable syncytium responses (**Fig. 4; Extended Data Figs. 5-6**), it is  
329 conceivable that astrocyte calcium excitation mediates more than one output and on multiple  
330 timescales. Astrocytes can modulate neural circuit activity on the seconds (i.e., individual trial)  
331 timescale by releasing neuroactive substances in a calcium-dependent manner (e.g.,

332 ATP/adenosine, D-serine, potassium)<sup>3</sup>. Neural circuit activity can also be modulated on the  
333 minutes (i.e., performance level) timescale by activity-dependent changes in astrocyte  
334 transporter activity, gap junctional coupling, metabolic support, or perisynaptic process  
335 structure.

336

337 How might these open questions about astrocyte syncytium responses be addressed? The  
338 quantitative visual detection task and computational methods employed in our study may help  
339 address these fundamental questions. In conjunction with genetically encoded neurotransmitter  
340 and neuromodulator sensors, our standardized approach may help reveal how behavior-  
341 dependent extracellular signals relate to astrocyte activity, as exemplified for dopamine  
342 (**Extended Data Fig. 4**). However, this may require further optimization of current transmitter  
343 sensors and their color variants to enable concurrent and high-resolution measurement of  
344 corresponding transient maps. Simultaneous recording of astrocyte and projection neuron  
345 activity can only partly replace such measurements, as calcium spiking does not identify the  
346 type and quantity of the transmitter(s) released or its spatial spread. Likewise, new indicators for  
347 intracellular signaling (e.g., IP<sub>3</sub>, cAMP, or PKA) and functional alterations (e.g., proximity  
348 assays) may in the future allow measurement of how the various molecular signals are  
349 integrated within astrocytes, how this spatiotemporal integration relates to astrocyte syncytium  
350 responses, and how these responses modulate astrocyte output<sup>28,29</sup>. One approach to  
351 determine the effect of astrocyte syncytium responses on local neural activity may be to  
352 leverage their intrinsic properties. We showed that the probability, onset, and magnitude of  
353 syncytium responses depend on inter-run distance (**Extended Data Fig. 2**), an effect previously  
354 described for cerebellar astrocytes and likely dependent on ER calcium store dynamics<sup>10</sup>.  
355 Animals trained to perform visual detection task trials at various inter-run distances may provide  
356 insight into how local neural activity changes in the presence or absence of astrocyte syncytium

357 responses. However, the dependency of astrocyte syncytium responses on trial-type,  
358 performance levels, and other behavioral variables suggests that approaches to globally in- or  
359 decrease astrocyte excitation (e.g., by opsin, DREADD, calcium pump, or chelator expression)  
360 may only partially mimic astrocytes' varied effects on neural circuits. Finally, applying our visual  
361 detection task and computational methods to other (e.g., sensory) brain regions should help  
362 determine conserved features of astrocyte encoding and circuit modulation and inform models  
363 of how astrocyte signaling may need to be incorporated into systems neuroscience.

364

365

366

367

368 **References**

369

370 1. Kastanenka, K. V. *et al.* A roadmap to integrate astrocytes into Systems Neuroscience.

371 *Glia* **68**, 5–26 (2020).

372 2. Nimmerjahn, A. & Bergles, D. E. Large-scale recording of astrocyte activity. *Curr. Opin.*

373 *Neurobiol.* **32**, 95–106 (2015).

374 3. Verkhratsky, A. & Nedergaard, M. Physiology of Astroglia. *Physiological Reviews* **98**,

375 239–389 (2018).

376 4. Bazargani, N. & Attwell, D. Amines, Astrocytes, and Arousal. *Neuron* **94**, 228–231 (2017).

377 5. Nagai, J. *et al.* Behaviorally consequential astrocytic regulation of neural circuits. *Neuron*

378 **109**, 576–596 (2021).

379 6. Wang, Y. *et al.* Accurate quantification of astrocyte and neurotransmitter fluorescence

380 dynamics for single-cell and population-level physiology. *Nat Neurosci* **22**, 1936–1944

381 (2019).

382 7. Bojarskaite, L. *et al.* Astrocytic Ca<sup>2+</sup> signaling is reduced during sleep and is involved in

383 the regulation of slow wave sleep. *Nat Commun* **11**, 3240–16 (2020).

384 8. Curreli, S., Bonato, J., Romanzi, S., Panzeri, S. & Fellin, T. Glial place cells:

385 complementary encoding of spatial information in hippocampal astrocytes. *bioRxiv*

386 (2021). doi:10.1101/2021.07.06.451296

387 9. Doron, A. *et al.* Hippocampal Astrocytes Encode Reward Location. *bioRxiv* (2021).

388 doi:10.1101/2021.07.07.451434

389 10. Nimmerjahn, A., Mukamel, E. A. & Schnitzer, M. J. Motor behavior activates Bergmann

390 glial networks. *Neuron* **62**, 400–412 (2009).

391 11. Paukert, M. *et al.* Norepinephrine controls astroglial responsiveness to local circuit

392 activity. *Neuron* **82**, 1263–1270 (2014).

393 12. Ding, F. *et al.*  $\alpha$ 1-Adrenergic receptors mediate coordinated Ca<sup>2+</sup> signaling of cortical



- 394 astrocytes in awake, behaving mice. *Cell Calcium* **54**, 387–394 (2013).
- 395 13. Green, D. M. & Swets, J. A. *Signal detection theory and psychophysics*. (Wiley, 1966).
- 396 14. Su, M. *et al.* Expression specificity of GFAP transgenes. *Neurochem. Res.* **29**, 2075–  
397 2093 (2004).
- 398 15. Brenner, M., Kisseberth, W. C., Su, Y., Besnard, F. & Messing, A. GFAP promoter directs  
399 astrocyte-specific expression in transgenic mice. *J. Neurosci.* **14**, 1030–1037 (1994).
- 400 16. Ali, F. & Kwan, A. C. Interpreting in vivo calcium signals from neuronal cell bodies, axons,  
401 and dendrites: a review. *Neurophotonics* **7**, 011402 (2020).
- 402 17. Patriarchi, T. *et al.* Ultrafast neuronal imaging of dopamine dynamics with designed  
403 genetically encoded sensors. *Science* **360**, (2018).
- 404 18. Wu, X. *et al.* Top 10 algorithms in data mining. *Knowl Inf Syst* **14**, 1–37 (2008).
- 405 19. Ting, K. M. in *Encyclopedia of Machine Learning and Data Mining* 260–260 (Springer,  
406 Boston, MA, 2017). doi:10.1007/978-1-4899-7687-1\_50
- 407 20. Patriarchi, T. *et al.* Imaging neuromodulators with high spatiotemporal resolution using  
408 genetically encoded indicators. *Nat Protoc* **14**, 3471–3505 (2019).
- 409 21. Reimer, J. *et al.* Pupil fluctuations track rapid changes in adrenergic and cholinergic  
410 activity in cortex. *Nat Commun* **7**, 13289 (2016).
- 411 22. Muller, A., Joseph, V., Slesinger, P. A. & Kleinfeld, D. Cell-based reporters reveal in vivo  
412 dynamics of dopamine and norepinephrine release in murine cortex. *Nat. Methods* **11**,  
413 1245–1252 (2014).
- 414 23. Rho, H.-J., Kim, J.-H. & Lee, S.-H. Function of Selective Neuromodulatory Projections in  
415 the Mammalian Cerebral Cortex: Comparison Between Cholinergic and Noradrenergic  
416 Systems. *Front Neural Circuits* **12**, 47 (2018).
- 417 24. Avery, M. C., Nitz, D. A., Chiba, A. A. & Krichmar, J. L. Simulation of cholinergic and  
418 noradrenergic modulation of behavior in uncertain environments. *Front Comput Neurosci*  
419 **6**, 5 (2012).

- 420 25. De Pittà, M. *et al.* Computational quest for understanding the role of astrocyte signaling in  
421 synaptic transmission and plasticity. *Front Comput Neurosci* **6**, 98 (2012).
- 422 26. Ma, Z., Stork, T., Bergles, D. E. & Freeman, M. R. Neuromodulators signal through  
423 astrocytes to alter neural circuit activity and behaviour. *Nature* **539**, 428–432 (2016).
- 424 27. Mu, Y. *et al.* Glia Accumulate Evidence that Actions Are Futile and Suppress  
425 Unsuccessful Behavior. *Cell* **178**, 27–43.e19 (2019).
- 426 28. Oe, Y. *et al.* Distinct temporal integration of noradrenaline signaling by astrocytic second  
427 messengers during vigilance. *Nat Commun* **11**, 471 (2020).
- 428 29. Octeau, J. C. *et al.* An Optical Neuron-Astrocyte Proximity Assay at Synaptic Distance  
429 Scales. *Neuron* **98**, 49–66.e9 (2018).
- 430

431 **Figures**

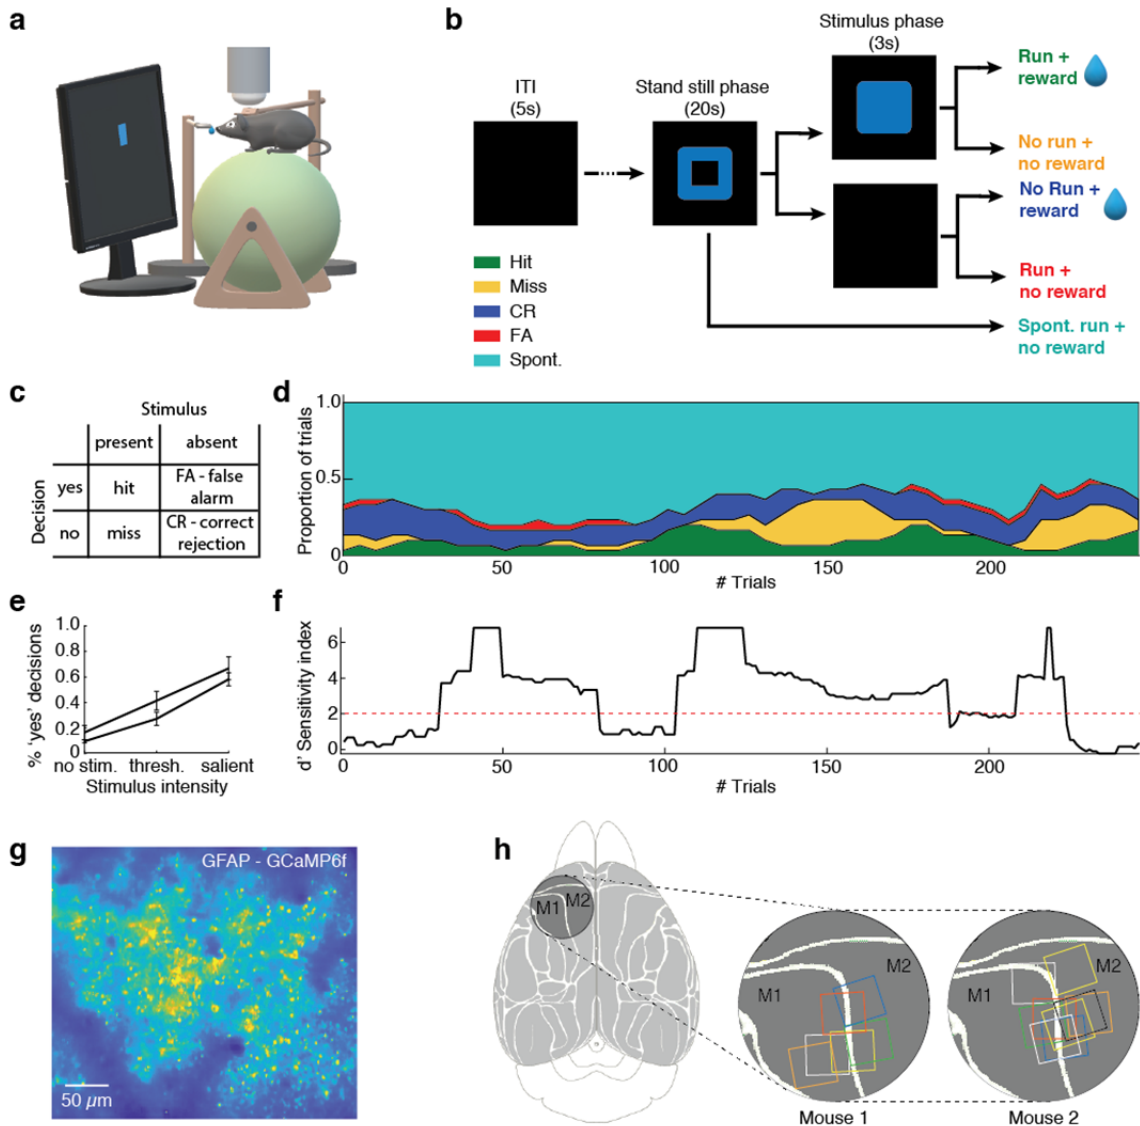

432

433 **Fig. 1 | Approach for relating astrocyte syncytium calcium signals to behavioral context**  
 434 **using detection task variables.**

435 **a**, Schematic of the experimental setup. Head-fixed mice were placed on a spherical treadmill  
 436 viewing a computer screen. Astrocytic calcium excitation was recorded in layer 2/3 of the M1/M2  
 437 motor cortex using two-photon microscopy while the mice performed the visual detection task.

438 In total, we recorded 4,837 trials during 21 behavioral sessions (see **Methods**). **b**, Schematic of

439 the behavioral protocol. A trial started when mice stopped running for 1 s. A visual cue (blue

440 frame) instructed mice to remain still for 20 s. Following this stand-still phase, a stimulus (blue  
441 square) was presented for 3 s in 50% of the trials. In the other half of the trials, no stimulus was  
442 shown. Stimulus intensity varied between two levels: salient and close to the perceptual  
443 threshold (see **Methods**). Stimulus presence and intensity were randomly selected. In trials with  
444 stimulus presentation, mice were required to start running within the 3 s stimulus phase to  
445 receive a fluid reward. In trials without stimulus presentation, mice had to remain still for a 3 s  
446 period to receive the reward. Spontaneous runs during the 20 s stand-still phase aborted  
447 stimulus presentation. Mice were able to initiate a new trial after a 5 s inter-trial interval.

448 **c**, Signal detection theory classes for behavioral outcomes (hit, miss, correct rejection, and false  
449 alarms), given two stimulus conditions (stimulus present or absent) and two possible decisions  
450 ('yes, stimulus present' and 'no, stimulus absent'). **d**, Proportions of behavioral outcomes  
451 during one example session. **e**, Average psychometric detection curves for two representative  
452 mice. **f**, The mouse's performance levels during the example session shown in *d*. The  
453 performance level was quantified using the  $d'$ -sensitivity index, calculated as the difference of  $z$ -  
454 scores for 'hit' and 'false alarm' rates. A  $d'$ -value of 2 was chosen to distinguish between high-  
455 and low-performance states. **g**, Heatmap of average GCaMP6f fluorescence in layer 2/3 from  
456 an example recording in area M1. **h**, *Left*, dorsal view of the mouse cortex with the chronic  
457 cranial window location indicated (circle). *Center* and *right*, imaging locations (squares) within  
458 the cranial window for two representative mice. M1, primary motor cortex; M2, secondary motor  
459 cortex.

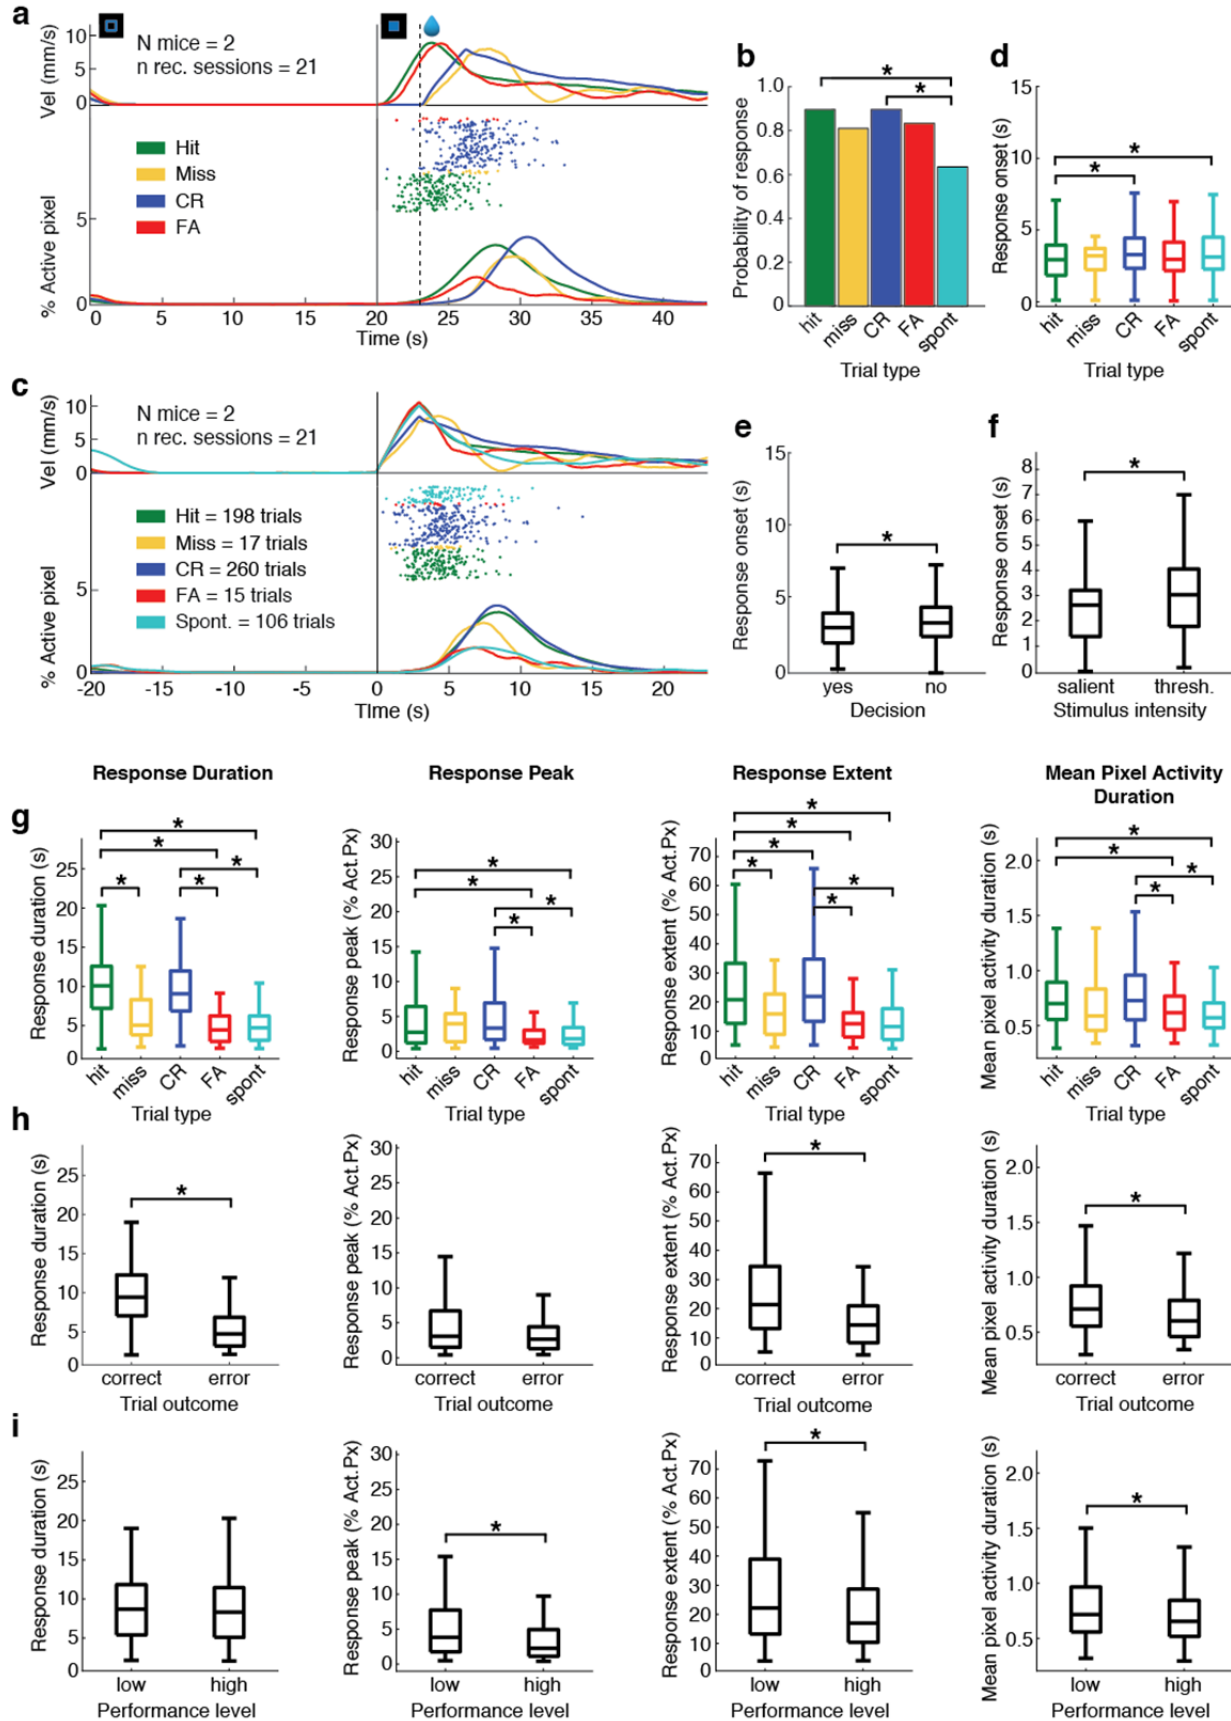

461 **Fig. 2 | Astrocyte syncytium responses encode detection task variables.**

462 **a-i**, Astrocyte syncytium responses encode reward, the animal's decision (stimulus present or  
463 stimulus absent), and performance level. **a**, Population data showing the astrocyte syncytium  
464 signals' dependence on the trial type. *Top*, running velocity profile for hit (green), miss (yellow),  
465 CR (blue), and FA trials (red). *Center*, onsets (colored dots) for individual qualifying astrocyte  
466 syncytium signals by trial type. *Bottom*, average astrocyte syncytium calcium signals,  
467 represented as the percentage of ROA (Regions of Activity) pixels over time (see **Extended**  
468 **Data Fig. 1**). Each colored trace is an average across the individual trials of a given type  
469 aligned to the stand-still cue onset (198 hit, 17 miss, 260 CR, 15 FA trials, and 106 spontaneous  
470 runs from 21 recording sessions). Only trials that included a run within a defined parameter  
471 range were included to ensure comparability (see **Methods**). Vertical lines at 20 s and 23 s  
472 mark the stimulus phase. **b**, Probability of observing a significant astrocyte syncytium response  
473 for the different detection task trial outcomes and spontaneous runs. Only spontaneous runs  
474 that occurred 15 s after stimulus onset and before the end of the 20 s stand-still phase were  
475 included in the analysis. **c**, Same population data as in **a**, but aligned at run onset (0 s).  
476 **d**, Astrocyte syncytium response onsets relative to run onset for the different trial types. The  
477 boxplot marks the median and the 25th and 75th percentiles of the data for each trial type. The  
478 whiskers cover ~99.3% of the data. **e**, The animals' 'yes' decision (based on hit and FA trials)  
479 was encoded by an earlier onset of the astrocyte syncytium response. **f**, Stimulus intensity was  
480 encoded by astrocytes' syncytium response onsets. **g**, Astrocyte signal strength, as quantified  
481 by response duration, peak, the total area under the response curve, and mean pixel activity  
482 duration (from left to right), was significantly larger for rewarded than spontaneous and in some  
483 characteristics for error trials. **h**, Encoding of rewarded versus error trials. Same layout as in **g**.  
484 Rewarded trials showed significantly longer response durations. **i**, The animal's performance  
485 level was encoded primarily by the astrocyte syncytium response amplitude. Low-performance

486 periods were associated with higher amplitudes. The layout is the same as in *g*. Statistical  
487 significance was derived from linear mixed-effects model (LME) analysis for all comparisons  
488 (see **Methods, Tables 2-10**).

489

490

491

492



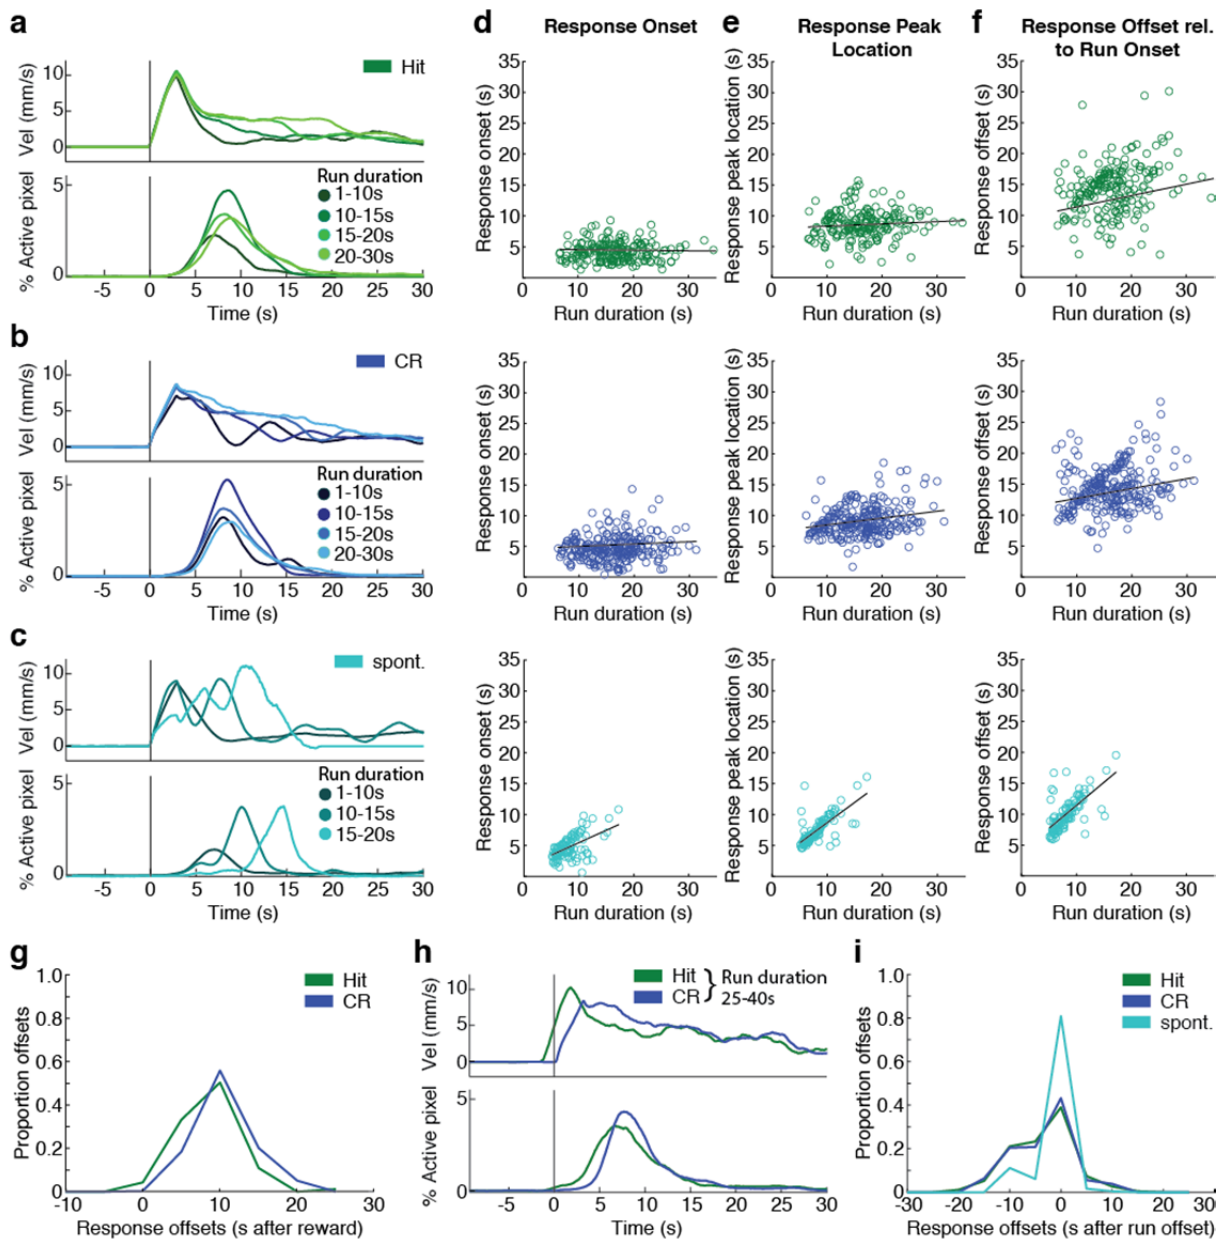

493

494 **Fig. 3 | Astrocyte syncytium responses show different run encoding mechanisms.**

495 **a-c**, Astrocyte syncytium responses, grouped by different run durations, revealed different  
 496 response profiles for rewarded run trials than spontaneous runs. **a**, Response profile for hit  
 497 trials. *Top*, running velocity profiles. *Bottom*, astrocyte syncytium responses for hit trials of  
 498 different run duration (19, 56, 75, and 47 trials of 1-10 s, 10-15 s, 15-20 s, and 20-30 s run  
 499 duration, respectively, from 21 recording sessions). **b**, Response profile for CR trials. Same



500 layout as in *a*. The data is an average across 36, 73, 98, and 53 runs of 1-10 s, 10-15 s, 15-20  
501 s, and 20-30 s duration, respectively, from 21 recording sessions. *c*, Response profile for  
502 spontaneous runs. Same layout as in *a*. The data is an average across 104, 19, and 3 runs of 1-  
503 10 s, 10-15 s, and 15-20 s duration, respectively, from 21 recording sessions. *d*, Astrocyte  
504 syncytium response onsets as a function of run duration for hit trials (*top*), CR trials (*center*),  
505 and spontaneous runs (*bottom*). *e*, Peak location of the astrocyte syncytium response as a  
506 function of run duration. Same layout as in *d*. *f*, Astrocyte syncytium response offsets relative to  
507 run onsets as a function of run duration. The layout is the same as in *d*. *g*, Histogram of  
508 astrocyte syncytium response offsets for rewarded trials (hit and CR) relative to reward onset  
509 (see also **Extended Data Fig. 4d**). Event frequencies were bin-normalized for each run duration  
510 interval. *h*, Profile of astrocyte syncytium responses for the longest runs (25-40 s). *Top*, running  
511 velocity. *Bottom*, astrocyte syncytium responses aligned at reward onset. *i*, Histogram of  
512 astrocyte response offsets relative to run offsets for hit trials, CR trials, and spontaneous runs.  
513 Event frequencies were bin-normalized for each run duration interval.

514

515

516

517

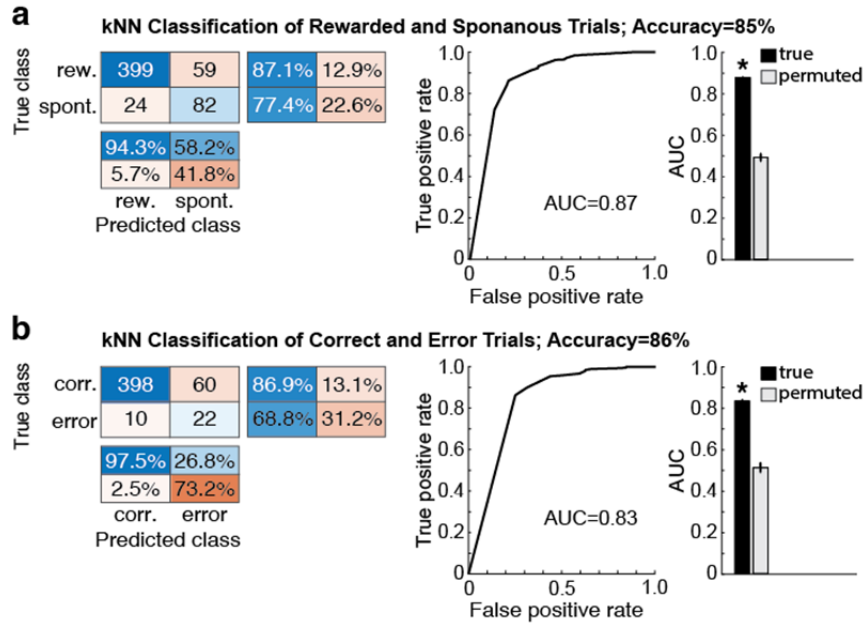

518

519

520 **Fig. 4 | Detection task variables can be decoded from astrocytic syncytium responses**  
 521 **using machine learning approaches.**

522 **a-b,** The k-nearest neighbor (kNN) classifier allows reliable decoding of rewarded/correct trials

523 from astrocytes' syncytium calcium responses. **a,** Classifier decoding performance of rewarded

524 trials from rewarded trial and spontaneous run astrocyte syncytium responses. *Left,* classifier

525 confusion matrices with rows representing the true classes and columns showing the classifier

526 predictions. The main diagonal shows how frequently the classifier correctly assigned the trials

527 to their real category (accuracy). Off-diagonal cells correspond to the count of incorrectly

528 classified trials. A row-normalized row summary and a column-normalized column summary

529 display the percentages of correctly and incorrectly classified trials for each true class or

530 predicted class, respectively. *Center,* receiver-operating characteristic (ROC) curve and area

531 under the ROC curve (AUC) for the classifier's output. *Right,* true data mean AUC values (black)

532 were obtained using a 10-fold cross-validation design, repeated 100 times, and compared to the

533 mean AUC values from shuffled trials (gray) when syncytium responses were randomly

534 assigned to one of the two classes. **b**, Classifier decoding performance of rewarded trials from  
535 rewarded and erroneous trial syncytium responses. The layout is the same as in *a*. Error bars  
536 indicate s.e.m.  
537

538 **Methods**

539

540 Experimental model and subject details

541

542 All procedures were performed following the National Institutes of Health (NIH) guidelines for  
543 the Care and Use of Laboratory Animals and were approved by the Institutional Animal Care  
544 and Use Committee (IACUC) at the Salk Institute. Mouse strains used in this study included  
545 Gfap-Cre 73.12 (RRID: IMSR\_JAX:012886) and Ai95D mice (RRID: IMSR\_JAX:024105)<sup>30,31</sup>.  
546 All imaging and behavioral experiments involved heterozygous male mice (N=4). Mice  
547 underwent two surgeries: head plate implantation at 8-10 weeks of age and cranial window  
548 implantation at ~12 weeks of age. Training started ~7 days after each surgery. Mice were water-  
549 restricted to 25 ml kg<sup>-1</sup> per day and maintained at 80-85% of their normal ad-libitum weight  
550 during training and imaging. Optical recordings were performed at ~20 weeks of age. Of the five  
551 mice trained on the task, one failed to reach proficiency. Mice were typically group-housed,  
552 provided with bedding and nesting material, and maintained on a 12 h light-dark cycle in a  
553 temperature (around 22°C) and humidity controlled (45-65%) environment. The animals had ad  
554 libitum access to standard rodent chow and water outside of training and imaging periods.

555

556 Live animal preparation

557

558 Head plate and cranial window implantation were performed as previously described<sup>17,20</sup>. Briefly,  
559 mice were anesthetized with isoflurane (4% and 2% for induction and maintenance,  
560 respectively) on a custom surgical bed (Thorlabs Inc., Newton, NJ). Body temperature was  
561 maintained at 36–37°C with a DC temperature control system. Ophthalmic ointment was used to  
562 prevent eyes from drying. The skin at the surgical site was cleaned and disinfected with 70%  
563 ethanol and Betadine. A small (~10 mm) incision was performed along the midline. The scalp  
564 was pulled open, and the periosteum was cleaned. A portion of the scalp was surgically  
565 removed to expose frontal, parietal, and interparietal skull segments. A custom metal plate was

566 affixed to the bone above the motor cortex with C&B Metabond Quick Adhesive Cement (Parkell  
567 Inc., Edgewood, NY). The cement also covered all other exposed skull regions.

568

569 After initial training, a custom-made cranial window was implanted to enable chronic two-photon  
570 imaging<sup>32</sup>. The skull was thinned above the motor cortex, and a craniotomy was performed (2.5  
571 mm diameter; centered around AP 1.5 mm / ML 1.5 mm). The dura mater was kept intact. The  
572 craniotomy was sealed with a custom three-layered cover glass assembly (each No.1 thickness)  
573 with the two layers closest to the cortex consisting of two circular 2.5 mm-diameter coverslips  
574 and the outermost layer consisting of a circular 3 mm-diameter cover glass that rested on the  
575 thinned skull. UV-curing optical adhesive (NOA 71, Norland Products, Inc.; cat. no. 7106) was  
576 used to attach the coverslips one at a time, taking care to avoid air inclusions that might  
577 interfere with imaging or facilitate cover glass detachment during the implantation period.

578

#### 579 Behavioral setup and data acquisition

580

581 Animal training was performed in a sound-attenuating cubicle (ENV-017M, Med Associates Inc.)  
582 using a custom-built setup. This setup included a color LCD monitor for stimulus presentation  
583 (12.1" LCD Display Kit/500cd/VGA, ICP Deutschland GmbH). Noise in optical recordings was  
584 minimized by covering the monitor with a color filter (R342 Rose Pink, Rosco Laboratories Inc.).  
585 The setup also included a spherical treadmill (Habitrail Mini Exercise Ball, Animal World  
586 Network), allowing the animal to run freely or when instructed. Mice were placed on the treadmill  
587 facing the LCD display. Head fixation was achieved by clamping the head plate with custom-  
588 build holders. An optical encoder (E7P OEM, US Digital) attached to the treadmill enabled  
589 measurement of both speed and direction of ball movement. Water reward was delivered with a  
590 programmable syringe pump (NE-500 OEM Syringe Pump, New Era Pump Systems, Inc.).  
591 Behavior-related signals were acquired through a data acquisition board (PCI-6221, National  
592 Instruments) connected to a breakout box (BNC-2110, National Instruments) and interfaced to

593 MATLAB using the Data Acquisition Toolbox (Version R2010bSP2, The MathWorks Inc.). The  
594 MATLAB-based software MonkeyLogic ([www.monkeylogic.net](http://www.monkeylogic.net))<sup>33,34</sup> controlled the behavioral  
595 task sequence. Custom-written functions were added to MonkeyLogic to enable analysis and  
596 control of ball rotation parameters. Treadmill encoder signals and trial marker codes, generated  
597 by MonkeyLogic, were acquired (10 kHz sampling rate;  $\pm 5$  V input range) in sync with the  
598 imaging data. Simultaneous acquisition through the microscope's software (MScan; Sutter  
599 Instrument Company) allowed run parameters, behavioral task events, and image frames to be  
600 linked with high temporal precision.

601  
602 Animal training

603  
604 Mice were handled/tamed on two consecutive days before behavioral training to reduce stress.  
605 During the first two training days, mice spent ~15-30 min/day in the setup to become  
606 accustomed to head restraint. Mice were then trained daily for 60-90 min during which they  
607 performed ~300-700 trials. A sequence of trial task events was initiated when mice stood still on  
608 the ball for 1 s. First, a blue square frame was displayed on the monitor, requiring the animal to  
609 continue standing still for 20 s (ball rotational velocity  $\leq 2$  mm/s). If the mouse remained still for  
610 this entire stand-still phase, a second stimulus (filled blue square) was presented for 3 s in 50%  
611 of trials, instructing the mouse to initiate a run. The stimulus was presented at two intensities:  
612 salient or close to the perceptual threshold (determined empirically towards the end of the  
613 training and kept at the same level during recordings). If the mouse initiated sustained  
614 movement during the 3 s stimulus phase (ball rotational velocity  $> 10$  mm/s for at least 1 s), a  
615 water reward was delivered (hit trial). If no running occurred, the trial counted as a miss trial. In  
616 the 50% of trials where no stimulus was presented, the mouse received a fluid reward when it  
617 remained still on the ball for 3 s (correct rejection, CR). Running during the 3 s period was  
618 counted as a false alarm (FA) trial. The trial was aborted and counted as a spontaneous run if

619 the animal moved during the 20 s stand-still phase (ball rotational velocity >2 mm/s). The mouse  
620 could initiate a new trial after an inter-trial interval (ITI) of 5 s.

621

#### 622 In vivo two-photon imaging

623

624 Once mice had reached proficiency on the task, two-photon imaging commenced. Mice were  
625 imaged daily for 9-12 days while performing the task. We used a resonant scanning two-photon  
626 microscope (Sutter Instrument) equipped with a pulsed femtosecond Ti:Sapphire laser  
627 (Chameleon Ultra II, Coherent) for simultaneous optical and analog data acquisition. GCaMP6f  
628 fluorescence was excited with 910 nm light and detected using an ET525/70M emission filter  
629 (Chroma Technology Corp.) and H7422-40 GaAsP photomultiplier tube (Hamamatsu  
630 Photonics). Average excitation power depended on imaging depth (typically 55-66 mW). The  
631 typical recording depth was 100-135  $\mu\text{m}$  below the pia. Data were acquired using a Nikon  
632 16 $\times$ 0.8-NA water immersion objective. A custom-made blackout curtain around the  
633 microscope's detector was used to reduce light contamination by the LCD monitor. Images  
634 (512 $\times$ 512 pixels) were acquired at 1.0x Zoom ( $\sim$ 510 $\times$ 640  $\mu\text{m}$  effective field of view after  
635 cropping) and  $\sim$ 30.9 frames/s using MScan software (Sutter Instrument Company). Each  
636 recording session consisted of five to twelve  $\sim$ 10 min recordings, separated by short imaging  
637 breaks (3-5 min). Recordings within a given session were performed at the same location to  
638 maximize the number of trial repetitions for analysis. Recordings from different sessions on  
639 consecutive days were offset either laterally or axially to maximize the tissue volume being  
640 sampled (**Fig. 1h**).

641

#### 642 Behavioral data processing and analysis

643

644 All data analyses were performed using custom-written MATLAB scripts (The MathWorks Inc).

645 The encoder signal (frequency of voltage changes) was converted to run velocity and smoothed

646 with a 3 s moving average window. This smoothing widened the signal by half the window size.  
647 We, therefore, shifted the smoothed velocity trace by +1.5 s for all analyses involving  
648 alignments at task events (trial onset, reward onset). Smoothing also lowered peak running  
649 speeds (**Fig. 2a**). Run onset threshold was set at 0.5 mm/s, while run offset was defined as the  
650 time when running speed fell below 0.1 mm/s. We chose these low thresholds because even  
651 small movements could elicit calcium responses. Run onsets <0.5 s after the offset of a  
652 previous run were considered as one running event. A trial-associated run counted as hit or FA  
653 if running lasted >1 s and exceeded 30 mm/s. The absence of ball movement (<0.5 mm/s)  
654 during the stimulus phase counted as CR trial. Run velocity was measured in real-time during  
655 animal behavior (without temporal smoothing). While all hit and FA trials included a run during  
656 the stimulus phase, miss and CR trials did not exhibit a run during this phase. However, they  
657 were often followed by a run after stimulus offset or reward delivery, respectively.

658  
659 To quantify the animals' task performance, we recorded all trial outcomes (**Fig. 1c**) and reaction  
660 times (RTs) (the time interval between stimulus and run onset). Mice were considered to have  
661 reached task proficiency when the proportion of correct decisions (hit and CR trials) exceeded  
662 50% over a 50 trial performance interval. Additionally, RTs for correct 'yes' decisions (hit trials)  
663 had to drop below 1.5 s. The psychometric curve for each mouse (**Fig. 1e**) was computed  
664 based on the proportion of 'yes' decisions for stimulus-absent (FA), threshold, and salient  
665 stimulus intensity trials (hit trials). A steep increase in miss trials at the end of the session  
666 indicated that mice had lost interest in the water reward. Trials beyond that point were excluded  
667 from the average performance analysis. To quantify the level of performance throughout the  
668 session, we calculated the discriminability index d-prime ( $d'$ , **Fig. 1f**) for each session as  
669  $Z(\text{hit}/(\text{hit} + \text{miss})) - Z(\text{FA}/(\text{FA} + \text{CR}))$ , with  $Z(p)$ ,  $p \in [0, 1]$ <sup>13</sup>. All trials during  $d' > 2$  phases were  
670 considered high-level performance trials. Trials during  $d' < 2$  phases were deemed to be low-level  
671 performance trials.



672

673 Image data processing and analysis

674

675 Lateral image motion (e.g., due to mouse movement) was corrected using the non-rigid  
676 movement correction algorithm NoRMCorre<sup>35</sup>. We used 200 frames from the first recording of a  
677 given session to compute the registration template. The same reference image was used to  
678 correct the image motion of other recordings taken at the same location.

679

680 We excluded regions over and immediately surrounding blood vessels to reduce artifacts  
681 caused by vascular dilation and constriction. First, we calculated a baseline image by smoothing  
682 the image data temporally with a moving average of 1 s. Next, we determined the mode of the  
683 pixels. Areas below the 70<sup>th</sup> percentile of the baseline image's pixel intensity distribution were  
684 automatically excluded from data analysis.

685

686 While the GFAP promoter drives expression in most and predominantly astrocytes, a limited  
687 region-dependent neuronal expression (0.5-5% of labeled cells) has been described<sup>14,36</sup>. To  
688 identify corresponding regions in our data, we first calculated the mean intensity projection of all  
689 recordings at a given imaging site and segmented this image using the CellProfiler image-  
690 analysis software<sup>37</sup>. We allowed the total area of segments to vary between 8 and 300 pixels.  
691 Next, we extracted the fluorescence time trace  $F(t)$  from all segments by averaging the pixel  
692 intensities of all pixels within individual segments.  $\Delta F(t)/F$  was calculated as  $(F(t) -$   
693  $\text{mean } F) / \text{mean } F$ . Segments were classified manually by considering their morphology (from  
694 the mean intensity projection image), waveform shape, and event frequency and pattern (from  
695 the corresponding  $\Delta F(t)/F$  trace). Segments showing features of neuronal activity<sup>16</sup> were  
696 excluded. Between 4.5% and 12.8% of segments displayed neuronal characteristics in areas  
697 M1/M2.

698

699 To capture the high spatiotemporal complexity of astrocytes' calcium signals, we implemented a  
700 previously described activity-based algorithm based on Regions-of-Activity (ROA) analysis<sup>7</sup> with  
701 a few modifications. The data were smoothed with a Gaussian filter ( $\sigma = 3$  pixels). To remove  
702 slow drifts in the calcium baseline, we detrended the time course of each pixel using the  
703 MATLAB function `detrend()` instead of bandpass filtering the data. Fluorescence events were  
704 determined based on noise-based thresholding over time for each pixel. First, the signals were  
705 high pass filtered. Then, the standard deviation of each pixel's noise over time was calculated.  
706 Whenever a given pixel's value in the standard deviation image exceeded the corresponding  
707 value 5-fold, the pixel was considered active. The syncytium response signal was calculated as  
708 the sum of the active pixels in the field of view (FOV) normalized by the total GCaMP6f labeled  
709 area over time.

710

711 Each astrocyte syncytium time trace includes multiple repetitions of the same trial type. To  
712 characterize the syncytium response to a given trial, we quantified its temporal features, such as  
713 response onset/offset, probability, and strength. To calculate response onset/offset, we first  
714 determined the mean syncytium response distribution during the baseline period (7-2 s before  
715 stimulus onset). We defined the 95<sup>th</sup> percentile of this baseline activity distribution as the  
716 significant response threshold (**Extended Data Fig. 1b**). Time points at which the signal  
717 surpassed or fell below this threshold relative to run onset were defined as response onset and  
718 offset, respectively. Response probability was calculated by determining the proportion of trials  
719 during which the astrocyte syncytium signal exceeded the threshold value during the 0.5-15 s  
720 response interval after run onset (if a run happened) or 0.5-17 s after stimulus onset (if no run  
721 was detected during that trial). Response strength was characterized by the (1) response  
722 duration (i.e., the interval between response on- and offset), (2) response peak (the maximum  
723 value reached during the response duration), (3) total spatial extent of the syncytium response

724 (defined as the percentage of active pixels in the projection image during the response interval),  
725 and (4) mean duration of consecutively active pixels during the response interval.

726

### 727 Statistical analysis

728

729 In total, we analyzed 4,837 trials from 21 behavioral sessions. Only trials with >7 mm/s ball  
730 rotational velocity (smoothed) and >5 s run duration were included in our analysis to ensure trial  
731 comparability. The analysis also included only spontaneous runs starting >15 s after the stand-  
732 still cue onset to ensure comparability of task-trial and spontaneous run-evoked syncytium  
733 responses. The resulting numbers of qualifying trials are shown in **Table 1**. Qualifying trial  
734 traces from all animals, all sessions, and trial types, associated with a run and significant  
735 syncytium response, were averaged and aligned at trial onset (**Fig. 2a**) or run onset to calculate  
736 population responses (**Fig. 2c**).

737

738 To quantify the relationship between astrocyte syncytium responses and behavioral variables,  
739 we performed linear mixed-effects analyses in MATLAB<sup>38</sup> (**Fig. 2**). Separate encoding models  
740 were fitted for astrocyte syncytium response probability, onset, duration, peak (log-transformed),  
741 total extent (log-transformed), and the mean duration of pixel activation (log-transformed) as  
742 dependent variables. Subject (mouse identity), recording area (M1/M2), trial type (hit, miss, CR,  
743 FA, spontaneous run), performance level (high/low), current run duration, current run amplitude,  
744 preceding run duration, preceding run amplitude, and the interval between current run onset and  
745 preceding run offset were included as fixed effects in the model. The recording session was  
746 treated as a random effect. To decide which behavioral variables to include in the model, we  
747 first performed a univariate analysis. We included the fixed factors separately and added the  
748 random effects to the model. If the p-value of a dependent variable's relationship to the tested  
749 fixed effect was <0.1, the factor was considered for inclusion in the final model. Next, a model

750 with all qualifying fixed effects and the random effect was set up for each dependent variable,  
751 followed by a backward step-down model selection. With every iteration, we excluded the fixed  
752 effect with the highest non-significant p-value until the p-values of all remaining factors were  
753  $<0.05$ . This value was chosen as the significance criterion. Visual inspection of residual plots for  
754 the final models did not reveal any apparent deviations from homoscedasticity or normality. We  
755 fitted a binomial generalized linear model using the MATLAB function `fitglm()` (**Table 2**) to  
756 analyze the relationship between syncytium response probability and behavioral parameters.  
757 We included only trials followed by a run and compared the proportions of trials with significant  
758 syncytium response to the proportion of trials without one (i.e., when the syncytium response  
759 remained under the threshold value). We also included the interaction between trial type and  
760 run duration in the model because this described our data better ( $p < 0.0001$ , Likelihood ratio  
761 test). For all other dependent variables, we fitted ordinary linear mixed-effects models using the  
762 MATLAB function `fitlme()` and included only trials with a run and significant syncytium response  
763 (**Tables 3-10**). To analyze differences between trials with or without a run, we used all trials with  
764 a significant syncytium response aligned at trial onset (**Table 11**). Mixed-effects model  
765 parameters were estimated by the maximum likelihood method. The significance of the  
766 regression coefficients was assessed using the t-statistic.

767

768 To investigate the relationship between run duration and syncytium response duration  
769 (**Extended Data Fig. 4a**), onset, peak location, and offset, aligned on run onset (**Fig. 3d-f**) or  
770 run offset (**Extended Data Fig. 4b**), we also applied linear regression analysis. Linear mixed-  
771 effects models were fitted separately for the rewarded trials (hits, CR) and spontaneous runs.  
772 Model selection criteria and analysis were the same as described above. The percent slope was  
773 determined by multiplying the regression coefficient by 100 (**Tables 12-16**).

774

775 To examine the relationship between response peak and run duration, we used responses with  
776 peak values >3% active pixels (**Extended Data Fig. 4c**). The peak values appeared to reach  
777 their maximum for 13 s-long runs. Linear models were fitted to trials with shorter (<13 s) and  
778 longer run durations (>13 s) separately for rewarded trials and spontaneous runs (**Table 17**).

779

780 To determine what triggers astrocyte syncytium response offset, we plotted the distribution of  
781 rewarded trial offsets aligned at reward onset (**Fig. 3g**). For comparison, we also plotted the  
782 rewarded and spontaneous run offsets aligned at run offset (**Fig. 3i**). For both histograms, we  
783 normalized the distribution of each predefined run duration interval (5-10 s, 10-15 s, 15-20 s, 20-  
784 25 s, 25 s-maximum run duration). For final representation, the normalized distributions were  
785 averaged. This approach helped to avoid biasing run durations that appeared more frequently  
786 during trials.

787

788 To decode information from astrocyte syncytium responses, we applied the k-Nearest Neighbor  
789 (kNN) classifier using the MATLAB function `fitcknn()` (**Fig. 4** and **Extended Data Figs. 5-6**). We  
790 represented the syncytium responses (% active pixels over time), from run onset to 30 s after  
791 run onset, as vectors in multidimensional feature space. The prior probabilities for all classes  
792 were defined as equal (i.e., 1/number of classes). The classifications were performed in a 10-  
793 fold cross-validation design (i.e., data was partitioned in 10 randomly chosen subsets). One  
794 data subset was used to validate the model, while the remaining subsets were used for training.  
795 We used automatic hyperparameter optimization to find hyperparameters that minimized the 10-  
796 fold cross-validation loss (see **Table 18** for resulting parameters for each classification).

797 Accuracy was calculated as the number of correct predictions divided by the total number of  
798 predictions. For decoding the animal's decision from erroneous syncytium responses, the  
799 classifier was trained on correct responses only. It was then tested on error trials that the  
800 classifier had not seen before.

801

802 To visualize the classifier performance, we used the “Receiver Operator Characteristic” (ROC)  
803 curve. We calculated the “Area Under the Curve” (AUC) to measure the classifier’s ability to  
804 distinguish between classes. We extended the ROC-AUC calculation to multiclass classification  
805 decoding, using the “one versus all technique” (i.e., the ROC for one class was generated to  
806 classify this class against everything else).

807

808 The classification process and the calculation of the AUC were repeated 100-times to ensure a  
809 reliable estimate of the average classification performance. To evaluate the significance of the  
810 classifier performance, we used permutation testing. In this test, the response traces were kept  
811 the same, but their labels were randomly permuted. After repeating the permutation procedure  
812 100-times, we calculated the AUCs for a classifier trained on a dataset with randomly assigned  
813 labels and tested on true classes. This approach generated a null distribution, which we used  
814 for the empirical p-value calculation (i.e., the proportion of permutations for which the AUC is  
815 greater than the score obtained using the original data)<sup>39</sup> (**Table 19**).

816

### 817 **Reporting summary**

818

819 Further information on research design is available in the Research Reporting Summary linked  
820 to this paper.

821

### 822 **Data availability**

823

824 The data that support the findings of this study will be deposited in the Brain Image Library (BIL;  
825 <https://www.brainimagelibrary.org/index.html>), as required for this BRAIN Initiative-funded  
826 project. They will also be available from the corresponding authors upon reasonable request.

827

828 **Code availability**

829

830 The custom Matlab-based code used for acquisition, processing, and analysis of the data will be  
831 deposited in GitHub, as required for this BRAIN Initiative-funded project. It will also be available  
832 from the corresponding authors upon reasonable request.

833

834 **References**

835

836 30. Garcia, A. D. R., Doan, N. B., Imura, T., Bush, T. G. & Sofroniew, M. V. GFAP-expressing  
837 progenitors are the principal source of constitutive neurogenesis in adult mouse forebrain.  
838 *Nat Neurosci* **7**, 1233–1241 (2004).

839 31. Madisen, L. *et al.* A toolbox of Cre-dependent optogenetic transgenic mice for light-  
840 induced activation and silencing. *Nat Neurosci* **15**, 793–802 (2012).

841 32. Goldey, G. J. *et al.* Removable cranial windows for long-term imaging in awake mice. *Nat*  
842 *Protoc* **9**, 2515–2538 (2014).

843 33. Asaad, W. F. & Eskandar, E. N. A flexible software tool for temporally-precise behavioral  
844 control in Matlab. *J. Neurosci. Methods* **174**, 245–258 (2008).

845 34. Asaad, W. F., Santhanam, N., McClellan, S. M. & Freedman, D. J. High-performance  
846 execution of psychophysical tasks with complex visual stimuli in MATLAB. *J Neurophys*  
847 (2012). doi:10.1152/jn.00527.2012

848 35. Pnevmatikakis, E. A. & Giovannucci, A. NoRMCorre: An online algorithm for piecewise  
849 rigid motion correction of calcium imaging data. *J. Neurosci. Methods* **291**, 83–94 (2017).

850 36. Brenner, M. & Messing, A. Regulation of GFAP Expression. *ASN Neuro* **13**,  
851 1759091420981206 (2021).

852 37. McQuin, C. *et al.* CellProfiler 3.0: Next-generation image processing for biology. *PLoS*  
853 *Biol.* **16**, e2005970 (2018).

854 38. Pinheiro, J. & Bates, D. *Mixed-effects models in S and S-PLUS*. (2006).

855 39. Ojala, M. & Garriga, G. C. Permutation tests for studying classifier performance. *Journal*  
856 *of Machine Learning* **11**, 1833–1863 (2010).

857

## 858 **Acknowledgments**

859

860 We thank J.H. Reynolds, T.J. Sejnowski, the U19 A-Team, and members of the Nimmerjahn lab  
861 for comments on the manuscript, the Salk machine shop for technical support, and J. Chambers  
862 for mouse colony management. This work was primarily supported by the National Institutes of  
863 Health (NIH) grant U19NS123719 (A.N.). It was partially supported by the NIH grants  
864 U01NS103522 (A.N.), R01NS108034 (A.N) and UL1TR001442 (Altman Clinical & Translational  
865 Research Institute; ACTRI). K.M. was a DFG research fellow and Catharina Foundation  
866 postdoctoral scholar. The content is solely the authors' responsibility and does not necessarily  
867 represent the official views of the NIH.

868

## 869 **Author contributions**

870

871 K.M. and A.N. conceived and designed the study. K.M. designed and performed the behavioral  
872 and imaging experiments with help from R.W.F. and D.D. K.M. designed and performed the  
873 statistical analysis with help from ACTRI services and prepared the figures. K.M. and A.N. wrote  
874 the text. All authors discussed the results, provided input or edits on the manuscript.

875

## 876 **Competing interests**

877

878 The authors declare no competing interests.

879

880 Correspondence and requests for materials should be addressed to K.M. and A.N.

881

882



883 **Extended Data Figures**  
884

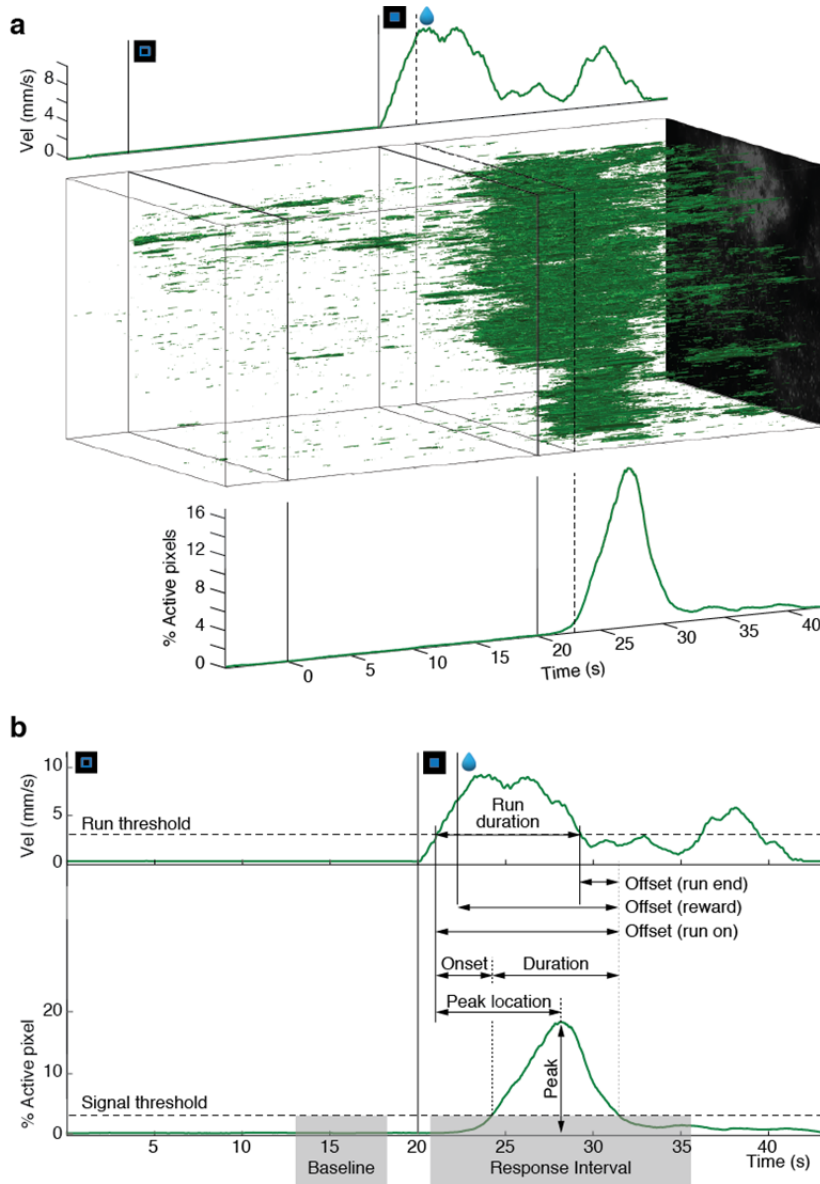

885  
886

887 **Extended Data Fig. 1 | Approach for extracting and analyzing astrocyte syncytium**

888 **calcium signals.**

889 **a**, The Regions of Activity (ROA) algorithm<sup>7</sup> was used to extract and characterize astrocyte  
890 syncytium calcium signals. The example data shows one representative hit trial. *Top*, run  
891 velocity profile. *Center*, x-y-t rendering of active pixels detected within the (~510×640 μm field-  
892 of-view (FOV). *Bottom*, the percentage of active pixels over time normalized to all labeled pixels  
893 within the FOV. **b**, Schematic of the astrocyte signal characteristics used for data analysis. *Top*,  
894 run velocity profile. *Bottom*, astrocyte syncytium calcium signal.

895

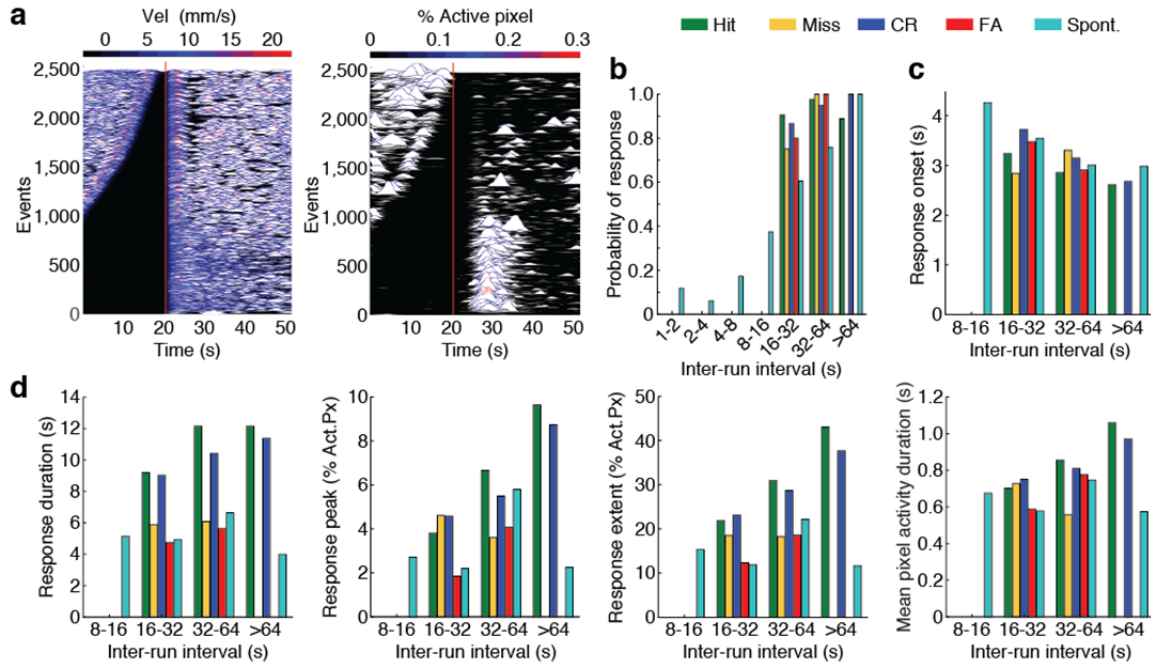

896

897

898 **Extended Data Fig. 2 | Astrocyte syncytium response properties depend on the rest**  
 899 **period between runs.**

900 **a-d**, Astrocytes' syncytium calcium response probability, onset, and strength in area M1/M2  
 901 depends on the rest period between runs. This inter-run interval dependency was accounted for  
 902 during data analysis, including only trials with >15 s rest periods between runs. **a**, Paired traces  
 903 of running activity (*left*) and syncytium calcium signals (*right*), ordered by the inter-trial interval  
 904 and aligned on the current run's onset (red lines). **b**, Astrocyte syncytium response probability  
 905 as a function of the inter-run interval and trial type. **c**, Astrocyte syncytium response onset as a  
 906 function of the inter-run interval and trial type. **d**, Astrocytes syncytium response strength, as  
 907 quantified by response duration, peak, total activation extent, and mean pixel activation duration  
 908 (*from left to right*), as a function of the inter-run interval and trial type.

909

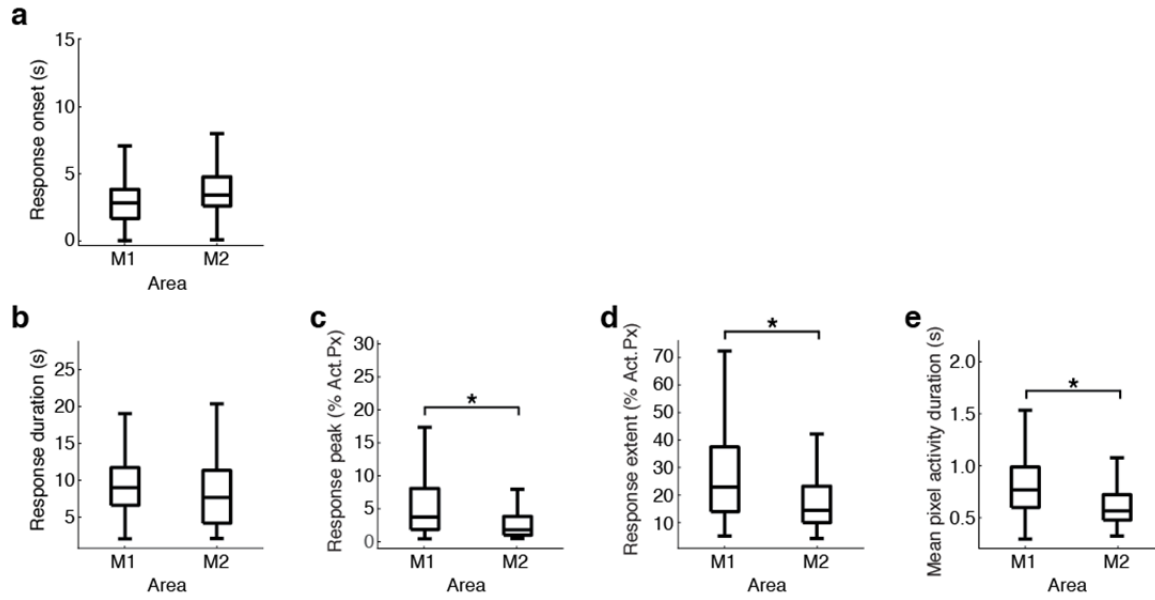

910

911

912 **Extended Data Fig. 3 | Astrocyte syncytium responses show regional differences.**

913 **a-e**, Astrocyte syncytium response onset and duration were comparable between areas M1 and  
914 M2 for the different trial types. In contrast, response peak, total activation extent, and mean  
915 pixel activation duration were significantly larger in area M1. **a**, Response onsets. **b**, Response  
916 durations. **c**, Response peaks. **d**, Total response extent. **e**, Mean pixel activation durations.

917

918

919

920

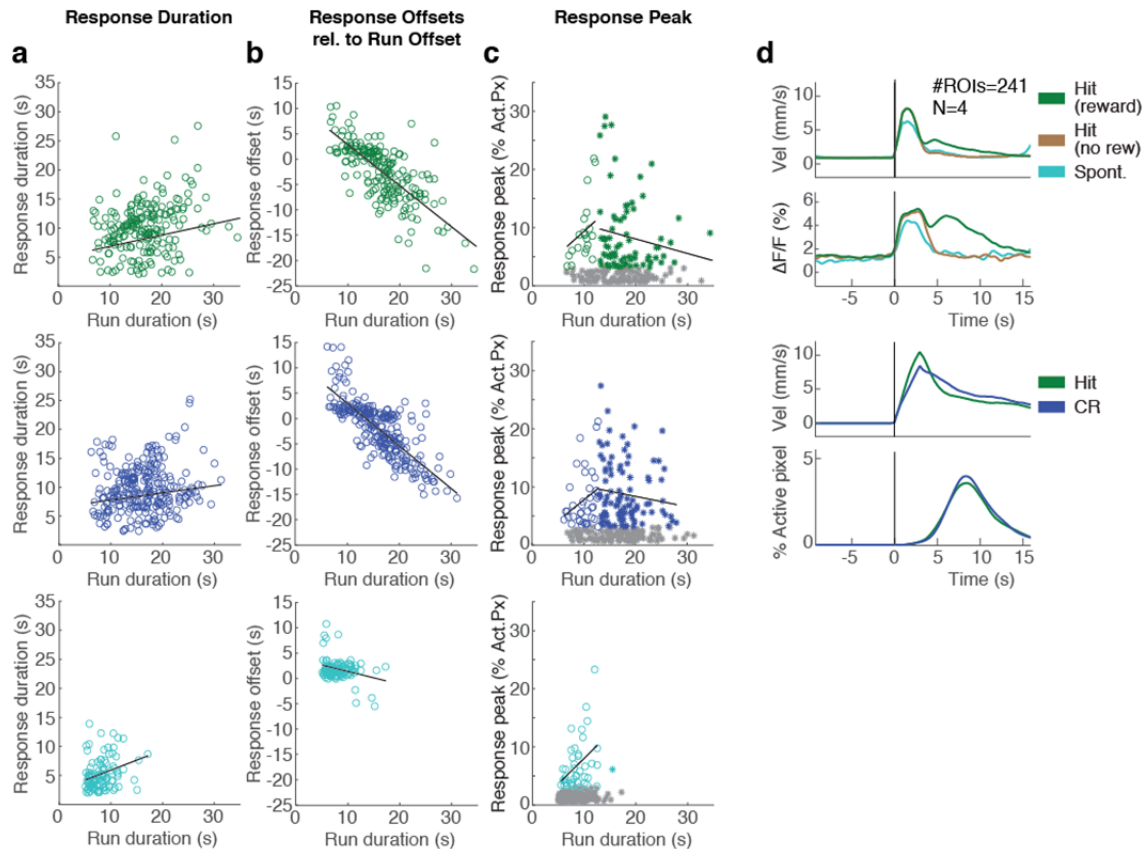

921

922

923 **Extended Data Fig. 4 | Astrocyte syncytium responses correlate with dopamine signaling**  
 924 **in rewarded trials.**

925 **a**, Astrocyte syncytium responses in hit trials, CR trials, and spontaneous runs (*top to bottom*)  
 926 increase slightly with run duration. **b**, Astrocyte syncytium response offsets relative to run offset  
 927 decrease strongly for longer run durations in hit (*top*) and CR (*center*) trials. Response offsets  
 928 coincide with run offsets in 13-15 s-long runs. In contrast, response offsets for spontaneous  
 929 runs (*bottom*) are only slightly modulated by run duration, coinciding mostly with run offsets.  
 930 **c**, Astrocyte syncytium response peak varies with run duration for hit trials, CR trials, and  
 931 spontaneous runs (*top to bottom*). 13 s-long runs produced the highest response peaks. Linear  
 932 fits to the data from <13 s and >13 s-long runs showed that response peak values steadily rose

933 toward the "preferred" 13 s run duration and declined after that. Trials with response peaks of  
934  $\leq 3\%$  active pixels (gray) were excluded from the linear fits. LME analysis was used to derive fit  
935 significance. **d**, Astrocyte response duration and offset in rewarded hit and CR trials correlated  
936 with the period dopamine is present in the extracellular space after reward delivery. Dopamine  
937 signals were measured with the genetically encoded indicator dLight1.2 in layer 2/3 of cortical  
938 areas M1/M2 during detection task performance<sup>17</sup>. *Top*, run velocity profiles and corresponding  
939 average dLight1.2 transients for rewarded hit trials (green), unrewarded hit trials (brown), and  
940 spontaneous runs (cyan) aligned at the run onset. The traces are an average across ROIs  
941 active during reward (241 ROIs from four mice). *Bottom*, run velocity profiles and corresponding  
942 astrocyte syncytium responses for rewarded hit (198 trials, green) and CR trials (260 trials, blue)  
943 aligned at the run onset.  
944

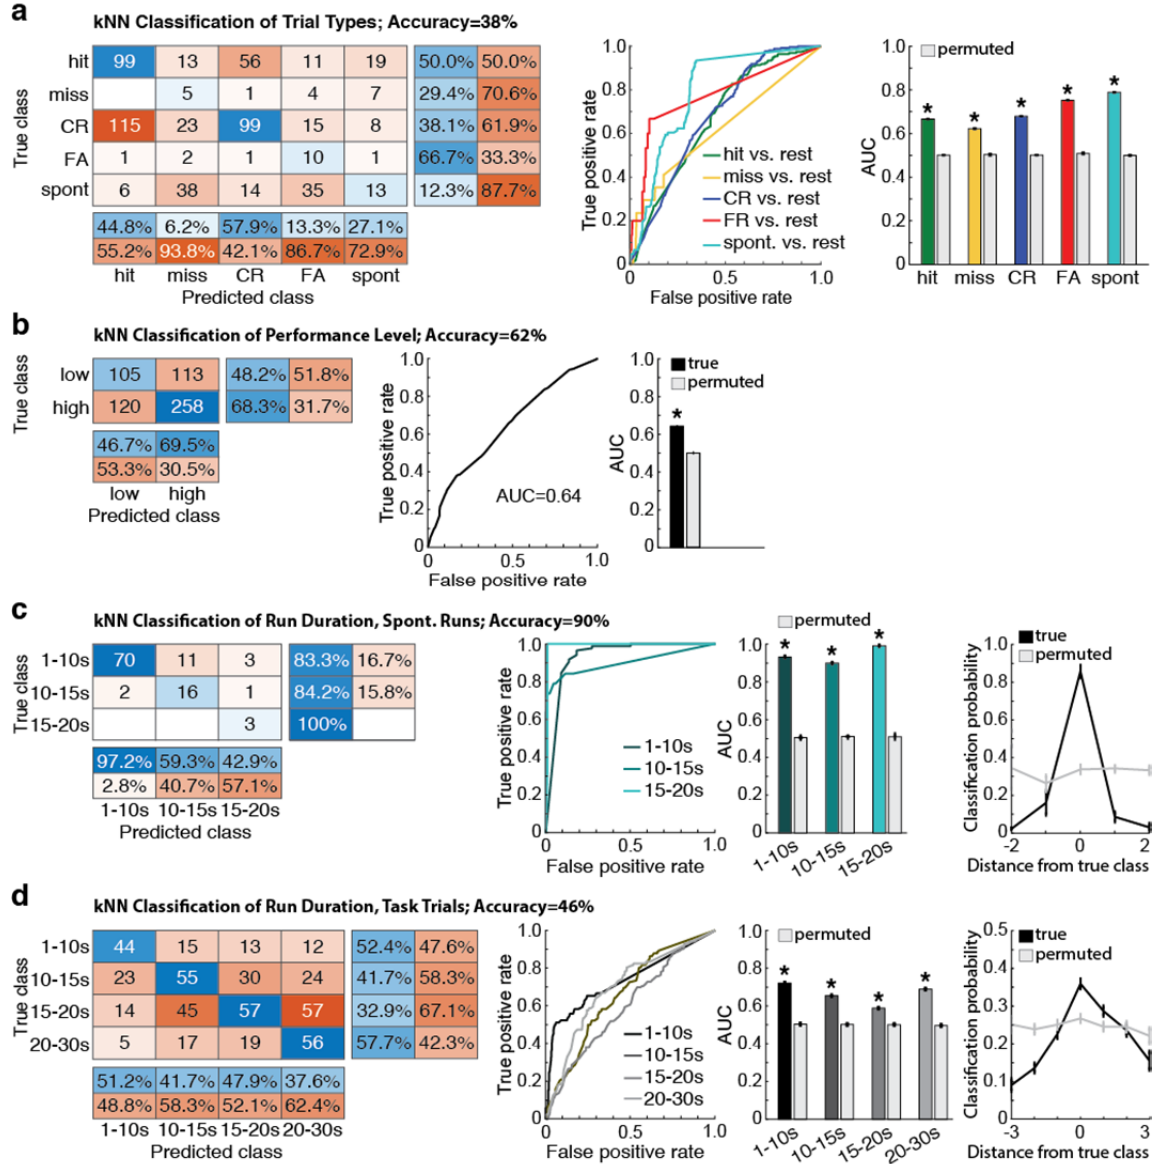

945

946

947 **Extended Data Fig. 5 | Behavioral aspects can be decoded from astrocytic syncytium**  
948 **responses using machine learning approaches.**

949 **a-d**, Astrocyte syncytium signals carry behavioral information as indicated by the k-nearest  
950 neighbor (kNN) classifier's prediction accuracy. For each classification, confusion matrices,  
951 receiver-operating characteristic (ROC) curves and area under the ROC curves (AUC) for the  
952 classifier's output, and statistical analysis of significance based on permutation tests are shown  
953 (*left to right*). Error bars indicate s.e.m. **a**, The kNN classifier decoded the trial type from  
954 astrocyte syncytium responses significantly above chance level. Most confusions happened  
955 between hit and CR trials. The decoding performance was worst for miss trials. **b**, Animal  
956 performance level could be significantly decoded from astrocyte syncytium signals.  
957 **c**, Spontaneous run durations could be decoded from astrocyte syncytium responses. **d**, Task-  
958 related run duration could be decoded from astrocyte syncytium responses. Confusions were  
959 more likely between neighboring run duration classes. Far-right plots in *c* and *d* show the  
960 decoding probabilities for a given run duration class as a function of distance from the true class  
961 (black line). The gray line depicts the average decoding probabilities based on permutation tests  
962 (see **Methods**).

963



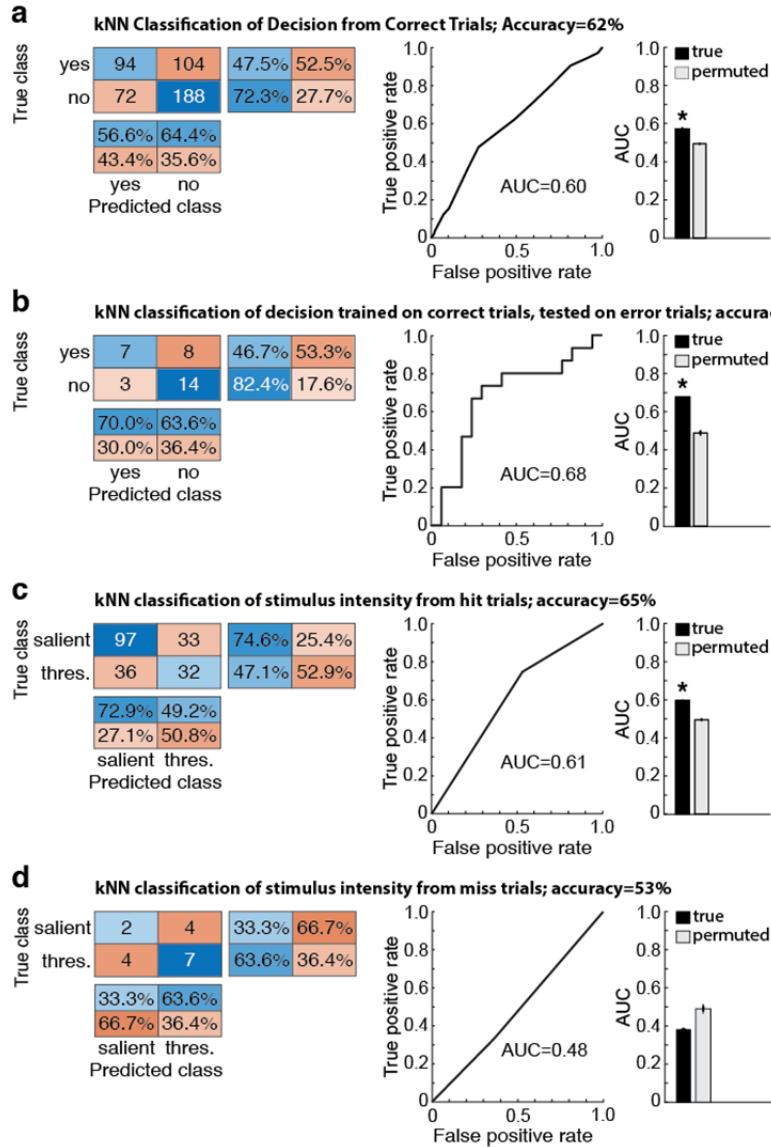

964

965

966

967 **Extended Data Fig. 6 | Astrocyte syncytium responses are behaviorally relevant.**

968 **a-d**, Separate classifications of correct and error trials reveal that information encoded by  
969 astrocyte syncytium calcium responses is relevant for the animal's behavior. For each  
970 classification, confusion matrices, receiver-operating characteristic (ROC) curves for the  
971 classifier's output and Area under the ROC curves (AUC), and statistical analysis of significance  
972 based on permutation tests are shown (*left to right*). Error bars indicate s.e.m. **a**, Decoding the  
973 animal's decision about stimulus presence or absence was possible from astrocytes' syncytium  
974 responses to hit and CR trials. **b**, Decoding the animal's decision was also possible when the  
975 classifier was trained on correct (hit and CR) but tested on erroneous (miss and FA) trials.  
976 Significant prediction of the animal's decision (miss-'no', FA-'yes') was confirmed by the AUC  
977 value. This value was significantly higher than AUC values obtained on a training set with  
978 randomly shuffled class labels. **c**, Information about stimulus intensity could be significantly  
979 decoded from astrocyte syncytium responses to hit trials. **d**, Miss trials lack behaviorally  
980 relevant sensory information, as the decoder fails to classify error trials according to stimulus  
981 intensity.

982

983

984

985

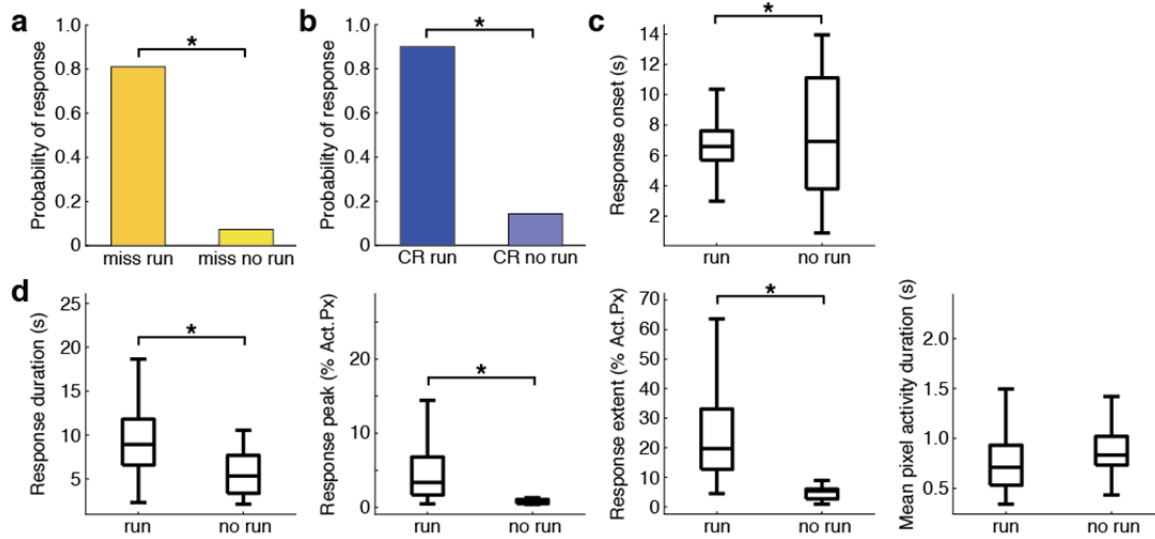

986

987 **Extended Data Fig. 7 | Astrocyte syncytium responses depend on run occurrence.**

988 **a-d**, Astrocyte syncytium responses are significantly different in miss and CR trials with or  
989 without a subsequent run. During miss and CR trials, the animals remain still throughout the  
990 stimulus presentation phase. However, they start running in most CR trials during reward  
991 consumption and occasionally miss trials after stimulus offset. These trial types allowed for the  
992 comparison of trials with and without a run. **a**, Astrocyte syncytium response probability for miss  
993 trials with and without a subsequent run. **b**, Astrocyte syncytium response probability for CR  
994 trials with and without a subsequent run. **c**, Response onsets for 'run' and 'no run' trials  
995 averaged across miss and CR trial types aligned at stimulus onset. **d**, Astrocyte syncytium  
996 response strength, as quantified by response duration, peak, total activation extent, and mean  
997 pixel activation (*from left to right*), for 'run' and 'no run' trials averaged across miss and CR trial  
998 types.

999

1000

1001

1002 **Extended Data Tables**

1003 **Table 1 | Numbers of trials included in the syncytium response analysis.**

|                                | Hit | Miss |        | CR  |        | FA | Spont. |
|--------------------------------|-----|------|--------|-----|--------|----|--------|
|                                |     | run  | no run | run | no run |    |        |
| <b>Significant response</b>    | 198 | 17   | 253    | 260 | 6      | 15 | 106    |
| <b>No significant response</b> | 23  | 4    | 20     | 30  | 1      | 3  | 61     |

1004  
1005  
1006  
1007

**Table 2 | Generalized linear mixed-effects model for astrocyte syncytium response probability.** All qualifying trials (**Table 1**), followed by a run, were included in the analysis. Degrees of freedom: 717.

| <b>Behavioral Variable</b>      | <b>Coefficient</b> | <b>Standard Error</b> | <b>p-value</b>    |
|---------------------------------|--------------------|-----------------------|-------------------|
| Trial type hit vs. miss         | 3.48               | 2.93                  | 0.23              |
| Trial type hit vs. CR           | -0.51              | 1.03                  | 0.62              |
| Trial type hit vs. FA           | -2.94              | 3.61                  | 0.42              |
| Trial type hit vs. spont.       | -2.96              | 1.12                  | 0.01              |
| Trial type miss vs. CR          | 0.66               | 0.64                  | 0.30              |
| Trial type miss vs. FA          | -0.01              | 0.88                  | 0.99              |
| Trial type miss vs. spont.      | -0.83              | 0.61                  | 0.18              |
| Trial type CR vs. FA            | -0.68              | 0.70                  | 0.33              |
| Trial type CR vs. spont.        | -1.49              | 0.29                  | $5 \cdot 10^{-7}$ |
| Trial type FA vs. spont.        | -0.81              | 0.68                  | 0.23              |
| Run duration                    | 0.12               | 0.05                  | 0.02              |
| Inter-run interval              | 0.04               | 0.01                  | $5 \cdot 10^{-4}$ |
| Trial type miss: Run duration   | -0.44              | 0.34                  | 0.19              |
| Trial type CR: Run duration     | 0.02               | 0.07                  | 0.74              |
| Trial type FA: Run duration     | 0.43               | 0.51                  | 0.40              |
| Trial type spont.: Run duration | 0.31               | 0.12                  | 0.01              |

1008  
1009  
1010

1011 **Table 3 | Linear mixed-effects model for astrocyte syncytium response onset.** All qualifying trials  
1012 (Table 1) with a run and significant syncytium response were included. Degrees of freedom: 590.

| <b>Behavioral Variable</b> | <b>Coefficient</b> | <b>Standard Error</b> | <b>p-value</b>    |
|----------------------------|--------------------|-----------------------|-------------------|
| Trial type hit vs. miss    | -0.07              | 0.40                  | 0.85              |
| Trial type hit vs. CR      | 0.81               | 0.15                  | $1 \cdot 10^{-7}$ |
| Trial type hit vs. FA      | 0.64               | 0.41                  | 0.12              |
| Trial type hit vs. spont.  | 0.60               | 0.20                  | 0.002             |
| Trial type miss vs. CR     | 0.88               | 0.40                  | 0.03              |
| Trial type miss vs. FA     | 0.71               | 0.54                  | 0.19              |
| Trial type miss vs. spont. | 0.68               | 0.40                  | 0.09              |
| Trial type CR vs. FA       | -0.17              | 0.41                  | 0.67              |
| Trial type CR vs. spont.   | -0.21              | 0.19                  | 0.29              |
| Trial type FA vs. spont.   | 0.03               | 0.42                  | 0.94              |
| Inter-run interval         | 0.04               | 0.01                  | $5 \cdot 10^{-4}$ |

1013  
1014  
1015  
1016  
1017  
1018  
1019

**Table 4 | Linear mixed-effects model for astrocyte syncytium response duration.** All qualifying trials  
(Table 1) with a run and significant syncytium response were included. Degrees of freedom: 589.

| <b>Behavioral Variable</b> | <b>Coefficient</b> | <b>Standard Error</b> | <b>p-value</b>     |
|----------------------------|--------------------|-----------------------|--------------------|
| Trial type hit vs. miss    | -2.04              | 0.91                  | 0.02               |
| Trial type hit vs. CR      | -0.63              | 0.33                  | 0.06               |
| Trial type hit vs. FA      | -3.82              | 0.94                  | $5 \cdot 10^{-5}$  |
| Trial type hit vs. spont.  | -3.16              | 0.48                  | $1 \cdot 10^{-10}$ |
| Trial type miss vs. CR     | 1.40               | 0.90                  | 0.12               |
| Trial type miss vs. FA     | -1.78              | 1.19                  | 0.13               |
| Trial type miss vs. spont. | -1.12              | 0.88                  | 0.20               |
| Trial type CR vs. FA       | -3.19              | 0.93                  | $6 \cdot 10^{-4}$  |
| Trial type CR vs. spont.   | -2.52              | 0.47                  | $9 \cdot 10^{-8}$  |
| Trial type FA vs. spont.   | -0.66              | 0.92                  | 0.47               |
| Run duration               | 0.17               | 0.03                  | $3 \cdot 10^{-7}$  |
| Inter-run interval         | 0.03               | 0.01                  | $1 \cdot 10^{-6}$  |

1020  
1021  
1022

1023 **Table 5 | Linear mixed-effects model for astrocyte syncytium response peak.** All qualifying  
 1024 trials (**Table 1**) with a run and significant syncytium response were included. Degrees of  
 1025 freedom: 588.

| Behavioral Variable        | Coefficient | Standard Error | p-value            |
|----------------------------|-------------|----------------|--------------------|
| Trial type hit vs. miss    | 0.04        | 0.22           | 0.87               |
| Trial type hit vs. CR      | -0.08       | 0.08           | 0.31               |
| Trial type hit vs. FA      | -0.61       | 0.22           | $6 \cdot 10^{-3}$  |
| Trial type hit vs. spont.  | -0.33       | 0.10           | $2 \cdot 10^{-3}$  |
| Trial type miss vs. CR     | -0.12       | 0.21           | 0.58               |
| Trial type miss vs. FA     | -0.65       | 0.3            | 0.03               |
| Trial type miss vs. spont. | -0.36       | 0.22           | 0.09               |
| Trial type CR vs. FA       | -0.53       | 0.22           | 0.02               |
| Trial type CR vs. spont.   | -0.24       | 0.10           | 0.02               |
| Trial type FA vs. spont.   | 0.28        | 0.22           | 0.20               |
| Area (M2)                  | -0.48       | 0.19           | $1 \cdot 10^{-83}$ |
| Performance (high)         | -0.29       | 0.08           | $1 \cdot 10^{-4}$  |
| Inter-run interval         | 0.01        | 0.001          | $7 \cdot 10^{-13}$ |

1026  
 1027  
 1028  
 1029  
 1030  
 1031  
 1032

**Table 6 | Linear mixed-effects model for astrocyte syncytium response extent.** All qualifying trials  
 (**Table 1**) with a run and significant syncytium response were included. Degrees of freedom: 588.

| Behavioral Variable        | Coefficient | Standard Error | p-value            |
|----------------------------|-------------|----------------|--------------------|
| Trial type hit vs. miss    | -0.31       | 0.14           | 0.03               |
| Trial type hit vs. CR      | -0.12       | 0.05           | 0.03               |
| Trial type hit vs. FA      | -0.64       | 0.15           | $2 \cdot 10^{-5}$  |
| Trial type hit vs. spont.  | -0.54       | 0.07           | $3 \cdot 10^{-14}$ |
| Trial type miss vs. CR     | 0.19        | 0.14           | 0.18               |
| Trial type miss vs. FA     | -0.33       | 0.19           | 0.08               |
| Trial type miss vs. spont. | -0.23       | 0.14           | 0.10               |
| Trial type CR vs. FA       | -0.52       | 0.14           | $4 \cdot 10^{-4}$  |
| Trial type CR vs. spont.   | -0.42       | 0.08           | $1 \cdot 10^{-9}$  |
| Trial type FA vs. spont.   | 0.10        | 0.15           | 0.50               |
| Area (M2)                  | -0.26       | 0.12           | 0.03               |
| Performance (high)         | -0.18       | 0.05           | $2 \cdot 10^{-4}$  |
| Inter-run interval         | 0.008       | 0.001          | $6 \cdot 10^{-14}$ |

1033  
 1034  
 1035

1036 **Table 7 | Linear mixed-effects model for mean pixel activity duration.** All qualifying trials (**Table 1**)  
 1037 with a run and significant syncytium response were included. Degrees of freedom: 588.

| Behavioral Variable        | Coefficient | Standard Error    | p-value            |
|----------------------------|-------------|-------------------|--------------------|
| Trial type hit vs. miss    | -0.09       | 0.07              | 0.23               |
| Trial type hit vs. CR      | -0.05       | 0.03              | 0.60               |
| Trial type hit vs. FA      | -0.25       | 0.07              | $7 \cdot 10^{-4}$  |
| Trial type hit vs. spont.  | -0.17       | 0.03              | $5 \cdot 10^{-7}$  |
| Trial type miss vs. CR     | 0.03        | 0.07              | 0.62               |
| Trial type miss vs. FA     | -0.16       | 0.09              | 0.09               |
| Trial type miss vs. spont. | -0.09       | 0.07              | 0.21               |
| Trial type CR vs. FA       | -0.19       | 0.07              | 0.006              |
| Trial type CR vs. spont.   | -0.12       | 0.03              | $2 \cdot 10^{-4}$  |
| Trial type FA vs. spont.   | 0.07        | 0.07              | 0.31               |
| Area (M2)                  | -0.20       | 0.09              | 0.02               |
| Performance (high)         | -0.07       | 0.02              | 0.005              |
| Inter-run interval         | 0.003       | $5 \cdot 10^{-4}$ | $3 \cdot 10^{-10}$ |

1038  
 1039  
 1040  
 1041  
 1042  
 1043  
 1044  
 1045  
 1046

**Table 8 | Linear mixed-effects models for astrocyte syncytium response strength probing correct/error trial encoding.** The categorical variable correct/error was included instead of trial type. All qualifying task trials (**Table 1**) with a run and significant syncytium response were included. Degrees of freedom: 486.

| Behavioral Variable                 | Coefficient | Standard Error    | p-value            |
|-------------------------------------|-------------|-------------------|--------------------|
| <b>Response duration</b>            |             |                   |                    |
| Correct/Error trials                | -2.66       | 0.73              | $3 \cdot 10^{-4}$  |
| Run duration                        | 0.16        | 0.04              | $5 \cdot 10^{-6}$  |
| Inter-run interval                  | 0.03        | 0.007             | $6 \cdot 10^{-6}$  |
| <b>Extent</b>                       |             |                   |                    |
| Correct/Error trials                | -0.40       | 0.10              | $2 \cdot 10^{-4}$  |
| Performance (high)                  | -0.15       | 0.05              | 0.005              |
| Inter-run interval                  | 0.01        | 0.001             | $2 \cdot 10^{-12}$ |
| <b>Mean pixel activity duration</b> |             |                   |                    |
| Correct/Error trials                | -0.11       | 0.05              | 0.03               |
| Area (M2)                           | -0.21       | 0.09              | 0.03               |
| Inter-run interval                  | 0.003       | $5 \cdot 10^{-4}$ | $2 \cdot 10^{-9}$  |

1047  
 1048  
 1049

1050 **Table 9 | Linear mixed-effects model for astrocyte syncytium response onset probing decision**  
 1051 **encoding ('yes' - hit and FA trials; 'no' - CR and miss trials).** The categorical variable decision was  
 1052 included instead of the trial type. All qualifying task trials (**Table 1**) with a run and significant syncytium  
 1053 response were included. Degrees of freedom: 487.

| Behavioral Variable   | Coefficient | Standard Error | p-value           |
|-----------------------|-------------|----------------|-------------------|
| <b>Response onset</b> |             |                |                   |
| Decision (no)         | 0.68        | 0.15           | $5 \cdot 10^{-6}$ |
| Inter-run interval    | -0.01       | 0.003          | $4 \cdot 10^{-4}$ |

1054  
 1055  
 1056  
 1057  
 1058 **Table 10 | Linear mixed-effects model testing the relationship between astrocyte syncytium**  
 1059 **response and stimulus intensity.** Only hit trials with a run and a significant astrocyte syncytium  
 1060 response were included in the analysis (**Table 1**). Degrees of freedom: 240.

| Behavioral Variable     | Coefficient | Standard Error | p-value |
|-------------------------|-------------|----------------|---------|
| <b>Response onset</b>   |             |                |         |
| Stimulus type (thresh.) | 0.36        | 0.19           | 0.05    |
| Inter-run interval      | -0.01       | 0.01           | 0.05    |

1061  
 1062  
 1063  
 1064  
 1065 **Table 11 | Linear mixed-effects models examining the astrocyte syncytium response's probability,**  
 1066 **onset, and strength with respect to run occurrence.** All trials with a significant syncytium response  
 1067 were included (**Table 1**). All trials were aligned at trial onset.

| Behavioral Variable                 | Coefficient | Standard Error | p-value            | Degrees of Freedom |
|-------------------------------------|-------------|----------------|--------------------|--------------------|
| <b>Probability (miss trials)</b>    |             |                |                    |                    |
| Run/No run (run)                    | 4.2         | 0.74           | $1 \cdot 10^{-12}$ | 292                |
| <b>Probability (CR trials)</b>      |             |                |                    |                    |
| Run/No run (run)                    | 4.93        | 1.32           | $2 \cdot 10^{-4}$  | 295                |
| <b>Onset</b>                        |             |                |                    |                    |
| Run/No run (run)                    | -2.10       | 0.43           | $2 \cdot 10^{-5}$  | 297                |
| <b>Response duration</b>            |             |                |                    |                    |
| Run/No run (run)                    | 3.50        | 0.86           | $6 \cdot 10^{-5}$  | 294                |
| <b>Response peak</b>                |             |                |                    |                    |
| Run/No run (run)                    | 1.45        | 0.22           | $9 \cdot 10^{-11}$ | 294                |
| <b>Response extent</b>              |             |                |                    |                    |
| Run/No run (run)                    | 1.75        | 0.14           | $2 \cdot 10^{-29}$ | 297                |
| <b>Mean pixel activity duration</b> |             |                |                    |                    |
| Run/No run (run)                    | -0.09       | 0.07           | 0.25               | 297                |

1068  
 1069



1070 **Table 12 | Linear mixed-effects model for astrocyte syncytium response duration, testing for the**  
 1071 **effect of run duration in hit trials, CR trials, and spontaneous runs.** All qualifying trials (Table 1) with  
 1072 a run and significant syncytium response for the respective trial types were included.

| Behavioral Variable     | Coefficient | Standard Error | p-value           | Degrees of Freedom |
|-------------------------|-------------|----------------|-------------------|--------------------|
| <b>Hit trials</b>       |             |                |                   |                    |
| Run duration            | 0.19        | 0.05           | $4 \cdot 10^{-4}$ | 195                |
| Inter-run interval      | 0.06        | 0.01           | $9 \cdot 10^{-5}$ | 195                |
| <b>CR trials</b>        |             |                |                   |                    |
| Run duration            | 0.12        | 0.05           | 0.01              | 257                |
| Inter-run interval      | 0.02        | 0.01           | 0.003             | 257                |
| <b>Spontaneous runs</b> |             |                |                   |                    |
| Run duration            | 0.34        | 0.10           | $6 \cdot 10^{-4}$ | 104                |

1073  
 1074  
 1075  
 1076  
 1077  
 1078  
 1079  
 1080

**Table 13 | Linear mixed-effects model for astrocyte syncytium response onset, testing for the**  
**effect of run duration in hit trials, CR trials, and spontaneous runs.** All qualifying trials (Table 1) with  
 a run and significant syncytium response for the respective trial types were included.

| Behavioral Variable     | Coefficient | Standard Error | p-value            | Degrees of Freedom |
|-------------------------|-------------|----------------|--------------------|--------------------|
| <b>Hit trials</b>       |             |                |                    |                    |
| Run duration            | -0.009      | 0.02           | 0.61               | 195                |
| Inter-run interval      | -0.01       | 0.005          | 0.04               | 195                |
| <b>CR trials</b>        |             |                |                    |                    |
| Run duration            | 0.04        | 0.02           | 0.11               | 257                |
| Inter-run interval      | -0.01       | 0.004          | 0.006              | 257                |
| <b>Spontaneous runs</b> |             |                |                    |                    |
| Run duration            | 0.42        | 0.06           | $3 \cdot 10^{-11}$ | 103                |
| Inter-run interval      | -0.02       | 0.009          | 0.40               | 103                |

1081  
 1082  
 1083

1084 **Table 14 | Linear mixed-effects model for the astrocyte syncytium response's peak location**  
 1085 **testing for the effect of run duration in hit trials, CR trials, and spontaneous runs.** All qualifying  
 1086 trials (**Table 1**) with a run and significant syncytium response for the respective trial type were included.

| <b>Behavioral Variable</b> | <b>Coefficient</b> | <b>Standard Error</b> | <b>p-value</b>     | <b>Degrees of Freedom</b> |
|----------------------------|--------------------|-----------------------|--------------------|---------------------------|
| <b>Hit trials</b>          |                    |                       |                    |                           |
| Run duration               | 0.04               | 0.03                  | 0.21               | 196                       |
| <b>CR trials</b>           |                    |                       |                    |                           |
| Run duration               | 0.11               | 0.03                  | $4 \cdot 10^{-5}$  | 258                       |
| <b>Spontaneous runs</b>    |                    |                       |                    |                           |
| Run duration               | 0.66               | 0.06                  | $2 \cdot 10^{-18}$ | 104                       |

1087  
 1088  
 1089  
 1090  
 1091  
 1092  
 1093  
 1094  
 1095

**Table 15 | Linear mixed-effects model for astrocyte syncytium response offset aligned on run onset testing for the effect of run duration in hit trials, CR trials, and spontaneous runs.** All qualifying trials (**Table 1**) with a run and significant syncytium response for the respective trial types were included.

| <b>Behavioral Variable</b> | <b>Coefficient</b> | <b>Standard Error</b> | <b>p-value</b>     | <b>Degrees of Freedom</b> |
|----------------------------|--------------------|-----------------------|--------------------|---------------------------|
| <b>Hit trials</b>          |                    |                       |                    |                           |
| Run duration               | 0.18               | 0.05                  | $3 \cdot 10^{-4}$  | 195                       |
| Inter-run interval         | 0.50               | 0.01                  | $4 \cdot 10^{-4}$  | 195                       |
| <b>CR trials</b>           |                    |                       |                    |                           |
| Run duration               | 0.16               | 0.04                  | $6 \cdot 10^{-5}$  | 257                       |
| Inter-run interval         | 0.01               | 0.006                 | 0.05               | 257                       |
| <b>Spontaneous runs</b>    |                    |                       |                    |                           |
| Run duration               | 0.75               | 0.08                  | $8 \cdot 10^{-16}$ | 104                       |

1096  
 1097  
 1098

1099 **Table 16 | Linear mixed-effects model for astrocyte syncytium response offset aligned at the run**  
 1100 **offset, testing for the effect of run duration in hit trials, CR trials, and spontaneous runs.** All  
 1101 qualifying trials (**Table 1**) with a run and significant syncytium response for the respective trial types were  
 1102 included.

| Behavioral Variable     | Coefficient | Standard Error | p-value            | Degrees of Freedom |
|-------------------------|-------------|----------------|--------------------|--------------------|
| <b>Hit trials</b>       |             |                |                    |                    |
| Run duration            | -0.82       | 0.05           | $2 \cdot 10^{-37}$ | 195                |
| Inter-run interval      | 0.50        | 0.10           | $5 \cdot 10^{-4}$  | 195                |
| <b>CR trials</b>        |             |                |                    |                    |
| Run duration            | -0.84       | 0.04           | $2 \cdot 10^{-59}$ | 257                |
| Inter-run interval      | 0.01        | 0.006          | 0.05               | 257                |
| <b>Spontaneous runs</b> |             |                |                    |                    |
| Run duration            | -0.25       | 0.08           | 0.002              | 104                |

1103  
 1104  
 1105  
 1106  
 1107 **Table 17 | Linear mixed-effects model for determining the relationship between syncytium**  
 1108 **response peaks and run duration.** All qualifying trials (**Table 1**) with a run and significant syncytium  
 1109 response (>3% active pixels peak value) were included.

| Behavioral Variable     | Coefficient | Standard Error | p-value | Degrees of Freedom |
|-------------------------|-------------|----------------|---------|--------------------|
| <b>Hit trials</b>       |             |                |         |                    |
| Run duration <13s       | 0.15        | 0.04           | 0.002   | 19                 |
| Run duration >13s       | -0.02       | 0.01           | 0.12    | 70                 |
| <b>CR trials</b>        |             |                |         |                    |
| Run duration <13s       | 0.08        | 0.04           | 0.06    | 37                 |
| Run duration >13s       | -0.02       | 0.01           | 0.27    | 99                 |
| <b>Spontaneous runs</b> |             |                |         |                    |
| Run duration <13s       | 0.1         | 0.04           | 0.01    | 39                 |

1110  
 1111  
 1112  
 1113 **Table 18 | Optimized hyperparameters used in the kNN classification analyses.**

| Classification                          | Nr. neighbors | Distance    | Distance weight |
|-----------------------------------------|---------------|-------------|-----------------|
| Rewarded trials/ spontaneous runs       | 7             | correlation | equal           |
| Rewarded/ error, non-rewarded           | 7             | correlation | equal           |
| Trial types (hit, miss, CR, FA, spont.) | 9             | correlation | equal           |
| Performance                             | 11            | jaccard     | equal           |
| Run duration                            | 5             | cosine      | equal           |
| Decision                                | 50            | correlation | inverse         |

1114 correlation: linear correlation between observations (data were treated as a sequence of values)  
 1115 jaccard: Jaccard coefficient (the percentage of nonzero coordinates that differ)

1116 cosine: cosine of the angle between observations (data were treated as vectors)

1117

1118 **Table 19 | Permutation tests evaluating the kNN classifier's decoding performance.** All qualifying  
 1119 trials (Table 1) with a run and significant syncytium response for the respective trial types were included.

| Classification                             | mean AUC | Standard Error     | p-value |
|--------------------------------------------|----------|--------------------|---------|
| <b>Rewarded and spont. trials</b>          | 0.88     | 9·10 <sup>-9</sup> | 0       |
| <b>Rewarded and erroneous trials</b>       | 0.83     | 0.002              | 0       |
| <b>Performance level</b> (all trials used) | 0.64     | 0.001              | 0       |
| <b>Trial types</b> (all trials used)       |          |                    |         |
| hit                                        | 0.67     | 0.002              | 0       |
| miss                                       | 0.63     | 0.006              | 0.02    |
| CR                                         | 0.68     | 0.001              | 0       |
| FA                                         | 0.75     | 0.004              | 0.008   |
| spont.                                     | 0.79     | 0.001              | 0       |
| <b>Run duration, spont. runs</b>           |          |                    |         |
| 1-10s                                      | 0.93     | 0.001              | 0       |
| 10-15s                                     | 0.90     | 0.002              | 0       |
| 15-20s                                     | 0.99     | 0.001              | 0.02    |
| <b>Run duration, task trials</b>           |          |                    |         |
| 1-10s                                      | 0.72     | 0.002              | 0       |
| 10-15s                                     | 0.66     | 0.001              | 0       |
| 15-20s                                     | 0.58     | 0.002              | 0.01    |
| 20-30s                                     | 0.68     | 0.001              | 0       |
| <b>Decision</b>                            |          |                    |         |
| correct trials decoded from correct trials | 0.58     | 0.001              | 0       |
| error trials decoded from correct trials   | 0.68     | -                  | 0.03    |
| <b>Stimulus</b>                            |          |                    |         |
| correct trials decoded from correct trials | 0.59     | 0.002              | 0.01    |
| error trials decoded from error trials     | 0.38     | 0.007              | 0.51    |

1120

1121

1122

1123
